# Supplementary material
Source: PubMed Central journal article supplement (PMC6501672)
Supplement: rspb20182840supp1.pdf [file rspb20182840supp1.pdf]

1 **Electronic Supplemental Material for “Common Caribbean corals exhibit highly variable**  
2 *responses to future acidification and warming”*

3  
4 Colleen Bove, Justin Ries, Sarah Davies, Isaac Westfield, James Umbanhowar, Karl Castillo

5  
6 *Proceedings of the Royal Society B: Biological Sciences* (DOI: 10.1098/rspb.2018-2840)

7  
8 **Supplemental Methods:**

9  
10 **(a) Coral collection**

11 In June 2015, 6 colonies each of 4 reef-building coral species (*Siderastrea siderea*,  
12 *Pseudodiploria strigosa*, *Porites astreoides*, and *Undaria tenuifolia*; figure S1) were collected  
13 from an inshore reef (Port Honduras Marine Reserve; 16°11'23.5314"N, 88°34'21.9360"W) and  
14 6 colonies of each of the 4 coral species were collected from an offshore reef (Sapodilla Cayes  
15 Marine Reserve; 16°07'00.0114"N, 88°15'41.1834"W) along the Belize Mesoamerican Barrier  
16 Reef System (MBRS) at a depth of 3 to 5 m. A total of 48 coral colonies were collected from  
17 both reef environments (2 reef environments x 4 species x 6 colonies). The inshore reef is 9 km  
18 from the mainland of Belize, while the offshore reef is approximately 37 km from the mainland.

19  
20 **(b) Experimental design and setup**

21 Corals were transported to Northeastern University's natural flow-through seawater  
22 system located at the Marine Science Centre, where corals were sectioned with a seawater-  
23 cooled tile-cutting saw. Each sectioned coral fragment (approximate surface area: 5 cm x 3 cm =  
24 15 cm<sup>2</sup>; approximate thickness: 2 cm) was mounted on to the outer surface of a 47 mm  
25 polystyrene petri dish (EMD Millipore; Billerica, Massachusetts, USA) using Loctite®  
26 cyanoacrylate adhesive (Düsseldorf, Germany). All 384 coral fragments (i.e., 48 colonies x 8  
27 fragments) were placed into 1 of 8 treatments (4 fragments per species per tank; 16 fragments per  
28 tanks; 384 fragments in total; figure S2) filled with 5 µm-filtered seawater obtained from  
29 Massachusetts Bay off the coast of Boston, Massachusetts (see table S1 for *in situ* water  
30 chemistry data from Belize) [1, 2]. Corals were maintained in natural seawater at a salinity (±SD)  
31 of 30.7 (±0.8) and temperature (±SD) of 28.2°C (±0.5) for a recovery period of 23 days. After  
32 recovery, temperature and *p*CO<sub>2</sub> were adjusted every other day over a 20-day interval until target  
33 experimental conditions were approximately achieved for each treatment (temperature: 28 and  
34 31°C; *p*CO<sub>2</sub>: 280, 400, 700, 2800 µatm). Seawater temperatures in experimental tanks were  
35 incrementally increased by 0.4°C every 3 days and experimental *p*CO<sub>2</sub> was adjusted by -12 µatm  
36 (pre-industrial), 0 µatm (current-day), +30 µatm (end-of-century), and +240 µatm (extreme)  
37 during the 20-day adjustment interval before starting the 30-day acclimation period. Four *p*CO<sub>2</sub>  
38 treatments corresponding to pre-industrial (311/288 µatm), current-day (*p*CO<sub>2</sub> control; 405/447  
39 µatm), end-of-century (701/673 µatm), and an extreme (3309/3285 µatm) *p*CO<sub>2</sub> were maintained  
40 at two temperatures corresponding to the corals' approximate present day mean annual  
41 temperature (28°C; determined by over 10 years of *in situ* records) [3-5] and projected end-of-  
42 century annual mean temperature (31°C) [6].

43 Experimental 42 L acrylic tanks were illuminated by full spectrum LED lights  
44 (Euphotica; 120W, 20000K) on a 10:14 h light:dark cycle with photosynthetically active  
45 radiation (PAR) of ca. 300 µmol photons m<sup>-2</sup> s<sup>-1</sup> to simulate natural light cycles occurring within  
46 the corals' native habitat [7]. PAR was regularly measured within each tank using a LI-COR LI-

47 1500 data logger affixed with a LI-COR LI-192  $2\pi$  underwater quantum sensor (LI-COR;  
48 Lincoln, Nebraska, USA; figure S3). Experimental tanks were covered with an acrylic lid and  
49 wrapped in cellophane plastic to facilitate equilibrium between the gas mixtures and the  
50 experimental seawaters and to minimize evaporative water loss. Circulation and turbulence in the  
51 experimental tanks were maintained with a Maxi-Jet<sup>®</sup> 400 L h<sup>-1</sup> powerhead (Marineland;  
52 Blacksburg, Virginia, USA), which have been used in previous common garden experiments on  
53 corals from Belize [7, 8]. Freshly filtered natural seawater was added via the flow-through  
54 system so that the water in each tank was replenished *ca.* 1.3 times per day.

55 Experimental  $p\text{CO}_2$  gas mixtures were measured using Qubit S151 (range 0-2000  $\mu\text{atm}$ ;  
56 accuracy  $\pm 1 \mu\text{atm}$ ) and S153 (range 0-10%; accuracy  $\pm 0.3\%$ ) infrared  $p\text{CO}_2$  analyzers (Qubit  
57 Systems; Kingston, Ontario, Canada) calibrated with certified air- $\text{CO}_2$  gas standards. High-  
58 precision digital solenoid-valve mass flow controllers (*Aalborg* Instruments and Controls;  
59 Orangeburg, NY, USA) were used to bubble air alone (401; 447  $\mu\text{atm}$ ), or in combination with  
60  $\text{CO}_2$ -free air (311; 288  $\mu\text{atm}$ ) or  $\text{CO}_2$  gas (701; 673; 3309; 3285  $\mu\text{atm}$ ) with compressed air to  
61 achieve gas mixtures of the desired  $p\text{CO}_2$ , and bubbled into each tank and sump via flexible air  
62 bubblers (table 2; figure S4). Because temperature affects the solubility of  $\text{CO}_2$  in seawater, the  
63 two temperature treatments averaged different carbonate parameters for each of the  $p\text{CO}_2$   
64 treatments, despite being sparged with the same gas mixture ratios (figure S4). These eight  
65  $p\text{CO}_2$ -temperature combinations were replicated three-fold (24 tanks total) and yielded the  
66 following treatment conditions ( $\pm\text{SD}$ ): 311 ( $\pm 96$ ), 405 ( $\pm 91$ ), 701 ( $\pm 94$ ), 3309 ( $\pm 414$ )  $\mu\text{atm } p\text{CO}_2$   
67 at 28°C ( $\pm 0.4$ ); and 288 ( $\pm 65$ ), 447 ( $\pm 152$ ), 673 ( $\pm 104$ ), 3285 ( $\pm 484$ )  $\mu\text{atm } p\text{CO}_2$  at 31.0°C  
68 ( $\pm 0.4$ ). The temperature of both the 28 and 31°C treatments were maintained using 50W glass  
69 aquarium heaters within each tank and 75W glass aquarium heaters (EHEIM; Deizisau,  
70 Germany) in each sump. Temperature, salinity, and pH were measured every other day and water  
71 samples were taken using 250 mL ground-glass-stoppered borosilicate glass bottles around 13:00  
72 Eastern Time every 10 days throughout the 93-day experimental period (9 September – 17  
73 December 2015). Total alkalinity was determined by closed-cell potentiometric Gran titration  
74 and DIC was determined by coulometry (UIC 5400), with both methods calibrated with certified  
75 Dickson Laboratory standards for seawater  $\text{CO}_2$  measurements (Scripps Institution of  
76 Oceanography; San Diego, California, USA). Measured temperature, salinity, TA, and DIC were  
77 used to calculate carbonate parameters using  $\text{CO}_2\text{SYS}$  [9] with Roy et al. (1993) carbonic acid  
78 constants  $K_1$  and  $K_2$  [10], the Mucci (1983) value for the stoichiometric aragonite solubility  
79 product [11], and an atmospheric pressure of 1.015 atm (electronic supplementary material;  
80 figure S4; tables S2, S3). Moderate deviations between calculated and targeted parameters  
81 throughout the duration of the experiment resulted largely from biological activity within the  
82 aquaria and from minor seasonal changes in source water chemistry. Temperature was measured  
83 using a high precision partial-immersion glass thermometer (precision  $\pm 0.3\%$ ; accuracy  $\pm 0.4\%$ ).  
84 Salinity ( $\pm\text{SD}$ ) was measured using a YSI 3200 (Yellow Springs, Ohio, USA) conductivity meter  
85 with a 10.0 cm<sup>-1</sup> cell and maintained at 31.7 ( $\pm 0.2$ ), with slight natural seasonal variation as  
86 expected in Massachusetts Bay waters. An AccuFet<sup>™</sup> Solid-State pH probe (Fisher  
87 Scientific<sup>™</sup>; Waltham, Massachusetts, USA) calibrated with 7.00 and 10.01 NBS buffers  
88 maintained at experimental temperatures was used to measure pH in each tank (table S2; figure  
89 S4). Coral fragments within each tank were fed every other day with a mixture of *ca.* 6 g frozen  
90 adult *Artemia* sp. and 250 mL concentrated newly hatched live *Artemia* sp. (500 mL<sup>-1</sup>) to satisfy  
91 any heterotrophic feeding by each species [12, 13].

92



### 93 (c) Buoyant weight quantification

94 Coral fragments were suspended in a 38 L aquarium 4 cm below the surface in seawater  
95 (temperature, 28.2°C; salinity, 32.4) using an aluminum wire hanging from a Nimbus NBL 423e  
96 Precision Balance ( $\pm 0.0002$  precision,  $\pm 0.002$  accuracy; AE Adam<sup>®</sup>; Oxford, Connecticut, USA).  
97 A standard of a known mass was weighed three times before weighing corals in each tank to  
98 monitor any deviations in the balance over the course of the experiment. Each coral fragment  
99 was weighed three times, averaged, and normalized to surface area. Surface area was quantified  
100 in triplicate from photos of each nubbin taken at corresponding intervals using imaging software  
101 (IMAGE J).

102 A subsample of fragments from each coral species was selected for constructing the  
103 linear regression that relates the coral species' buoyant weight to their dry weight. Buoyant  
104 weight ('BW') and dry weight of the fragments are highly correlated for each species ( $R^2$  *S. siderea*  
105 = 0.970,  $p < 0.001$ ;  $R^2$  *P. strigosa* = 0.900,  $p < 0.001$ ;  $R^2$  *P. astreoides* = 0.980,  $p < 0.001$ ;  $R^2$  *U. tenuifolia* =  
106 0.983,  $p < 0.001$ ), therefore the change in buoyant weight should be proportional to the  
107 corresponding change in dry weight (figure S5).

108  
109 *S. siderea*: Dry weight (mg) = 1.9 \* BW + 3.47,  $R^2 = 0.970$

110 *P. strigosa*: Dry weight (mg) = 1.78 \* BW + 5.47,  $R^2 = 0.900$

111 *P. astreoides*: Dry weight (mg) = 1.93 \* BW + 4.51,  $R^2 = 0.980$

112 *U. tenuifolia*: Dry weight (mg) = 1.66 \* BW + 5.04,  $R^2 = 0.983$

### 114 (d) Linear Extension

115 A calcein horizon was emplaced into coral skeletons at the beginning of the experiment  
116 to establish a marker from which linear extension throughout the experiment could be measured  
117 [14]. Each experimental tank was dosed with 213.4 g of a 1% calcein solution for 5 days. During  
118 this period, the light cycle was increased to 14 h light in all tanks to ensure sufficient uptake of  
119 fluorescent marker into skeletons. At the completion of the experiment, tissue was removed from  
120 all coral fragments using a precision seawater sprayer (PointZero; Sunrise, Florida, USA).  
121 Sections 5mm thick were cut from the middle of each fragment using a DB-100 ReefKeeper<sup>TM</sup>  
122 diamond band saw (Inland; Madison Heights, Michigan, USA). The full thin sections were  
123 imaged under a stereo microscope outfitted with a blue fluorescent adapter with excitation 440–  
124 460nm (NIGHTSEA<sup>TM</sup>; Lexington, Massachusetts, USA). Linear extension was measured as the  
125 total area of new growth above the calcein line (figure S7) measured using imaging software  
126 (IMAGE J) divided by the measured length of the coral's lateral growth surface. Extension was  
127 then divided by the number of months in the experimental treatments resulting in linear  
128 extension per month ( $\text{mm month}^{-1}$ ).

### 130 (e) Estimation of gross calcification rates

131 Gross calcification rates were estimated by subtracting the corals' calculated gross  
132 dissolution rates from their net calcification rates at the aragonite saturation states of each  
133 treatment. Gross dissolution was calculated using gross dissolution regression equations derived  
134 in Ries et al. [15] for two coral species. The gross dissolution equation ('y') for the massive coral  
135 *S. siderea* was used to estimate gross dissolution of the massive corals *S. siderea*, *P. strigosa*,  
136 and *P. astreoides* from the current experiment, while the gross dissolution equation for the  
137 branching coral *O. arbuscula* was used to estimate gross dissolution of the branching coral *U.*  
138 *tenuifolia* [15] (figure S9).

139

140 *S. siderea*:  $y$  (%-wt/day) =  $0.055 - 0.638 * e^{(-6.187 * \Omega_A + 2.039 * \Omega_A)}$

141 *O. arbuscula*:  $y$  (%-wt/day) =  $0.073 - 0.638 * e^{(-5.632 * \Omega_A + 2.039 * \Omega_A)}$

142

### 143 (f) Survival quantification and analysis

144 Coral fragments were assessed for mortality every 30 days and considered dead when no  
145 living tissue remained. Impacts of  $p\text{CO}_2$  and temperature on survival rates were assessed using a  
146 Kaplan-Meier estimate of survival (*survfit*, *survival*, 2.39-5) [16]. Cox proportional hazard  
147 models, with colony nested within tank as a random effect, were performed using *coxme* (2.2-5)  
148 [17].

149

### 150 (g) Further explanation of statistical analyses

151 Linear mixed effects models were fit to the calcification and linear extension data.  
152 Models were run to include species,  $p\text{CO}_2$  (factor), and temperature (factor) as fixed effects with  
153 colony (genotype) as a random effect:

154

$$\text{lmer}(\text{rate} \sim \text{species} * (p\text{CO}_2 + \text{temperature}) + (1 | \text{colony}))$$

155

156 This model was selected using AIC and log likelihood tests to determine the best fit for the data.  
157 A parametric bootstrap of the data was run 1500 times for each model, resulting in the modelled  
158 mean and 95% confidence intervals. Colonies were pooled by natal reef environment in all  
159 analyses because this was not a significant predictor of any measured parameter. All statistical  
160 analyses were performed using R 3.3.2 for OS X [18].

161

162 A Bayesian hierarchical regression model was fit to calculate credible intervals of the  
163 corresponding extracted correlation coefficients using Hamiltonian MCMC, using default  
164 uninformative priors. Four chains were run for 1000 iterations after a 1000-iteration warmup.  
165 Chains mixed well and all Rhats were less than 1.0. The model was fit with species,  $p\text{CO}_2$   
166 (factor), and temperature (factor) as fixed effects with colony (genotype) as a random intercept  
167 and temperature and  $p\text{CO}_2$  as random slopes:

168

$$\text{brms}(\text{rate} \sim \text{species} * (p\text{CO}_2 + \text{temperature}) + (1 + p\text{CO}_2 + \text{temperature} | \text{colony}), \text{family} = \text{gaussian}())$$

169

170

## 171 Supplemental Results:

172

### 173 (a) Coral survivorship

174 *Siderastrea siderea* maintained nearly 100% survival across treatments, resulting in no  
175 significant effect of temperature ( $p = 0.23$ ),  $p\text{CO}_2$  ( $p = 0.60$ ), or their interaction ( $p = 1.0$ ) on  
176 survival (figure S6a). Survival of *P. strigosa*, *P. astreoides*, and *U. tenuifolia* reared at 31°C was  
177 significantly reduced compared to conspecifics reared at 28°C ( $p < 0.01$ ,  $p < 0.01$ ,  $p < 0.01$ ,  
178 respectively; figure 3b-d). No *U. tenuifolia* fragments under extreme  $p\text{CO}_2$  conditions at 31°C  
179 survived the acclimation period, indicating that this species is extremely sensitive to these  
180 conditions. Increasing  $p\text{CO}_2$  had no effect on survival of *P. astreoides* or *U. tenuifolia* ( $p = 0.09$   
181 and  $p = 0.22$ , respectively), while increasing  $p\text{CO}_2$  significantly increased survivorship of *P.*  
182 *strigosa* ( $p < 0.01$ ), a trend driven by relatively low survival at present-day  $p\text{CO}_2$ . Finally, the

183 interaction between  $p\text{CO}_2$  and temperature had no significant effect on survivorship of *P.*  
184 *strigosa*, *P. astreoides*, or *U. tenuifolia* ( $p < 0.08$ ,  $p < 0.25$ ,  $p < 0.21$ , respectively; figure S6b-d;  
185 tables S9, S10, S11).  
186

### 187 **(b) Effects of exposure duration on calcification rate**

188 Differences in calcification rates for the four species were also examined across three 30-  
189 day observation intervals (T0-T30, T31-60, and T61-T90) to assess the impact of duration of  
190 exposure to treatment conditions on coral calcification rates. Although responses are complex,  
191 some general patterns emerged.

192 Specimens of *S. siderea* exhibited a slight increase in calcification rates from the first  
193 (T0-T30) to second (T31-T60) intervals in most treatments, followed by a decline from the  
194 second to third (T61-T90) interval (figure S13a). In addition, calcification rates for coral reared  
195 at 28°C and 31°C under extreme  $p\text{CO}_2$  are lower at each interval when compared with the lower  
196  $p\text{CO}_2$  treatments.

197 Calcification rates of *P. strigosa* were generally higher at 28°C than at 31°C at every 30-  
198 day interval, regardless of  $p\text{CO}_2$  treatment. Excluding specimens reared under current-day  $p\text{CO}_2$   
199 at 28°C, calcification rates progressively declined across the three 30-day observational intervals  
200 of the experiment (figure S13b).

201 *Porites astreoides* calcification rates demonstrated a declining trend across observational  
202 intervals within most temperature- $p\text{CO}_2$  treatment combinations, and exhibited net dissolution  
203 during the final interval (figure S13C). However, some specimens failed to exhibit net  
204 calcification during any of the three intervals at either temperature.

205 Calcification rates of *U. tenuifolia* exhibited a decreasing trend across the three  
206 observational intervals for all  $p\text{CO}_2$  and temperature treatment combinations (figure S13d).  
207 Missing data from the 31°C treatment in both the current-day and extreme  $p\text{CO}_2$  treatments  
208 reflects the low survival rates in these treatments.  
209  
210

## 211 **Supplemental Discussion:**

### 213 **(a) Corals' natal reef environment does not influence resilience to $p\text{CO}_2$ or thermal stress**

214 Rates of calcification, linear extension, and survival were not significantly impacted by  
215 natal reef environment (i.e., inshore vs. offshore) of the four coral species investigated here  
216 (figures S11, S12; tables S11, S12, S13). This result is consistent with previous laboratory  
217 experiments on some of the same and other species of zooxanthellate corals, which found no  
218 difference in responses to thermal and  $p\text{CO}_2$  stress due to natal reef environment [7, 8], but  
219 inconsistent with historical growth records of *S. siderea* obtained from century-scale coral cores  
220 that showed that the extension rate of forereef colonies has declined much faster than that of  
221 backreef and nearshore colonies [19]. However, it is possible that natal-reef-environment  
222 differences in resilience to thermal stress may emerge with more prolonged exposure to  
223 acidification and warming stress, as well as with larger sample sizes.  
224  
225

226 **Supplemental tables and figures:**

227

| <b>Reef environment</b> | <b>T (°C)</b> | <b>pCO<sub>2</sub> (µatm)</b> | <b>pH</b> | <b>TA (µM)</b> | <b>DIC (µM)</b> | <b>Ω<sub>A</sub></b> | <b>Salinity</b> |
|-------------------------|---------------|-------------------------------|-----------|----------------|-----------------|----------------------|-----------------|
| Inshore                 | 26.7          | 346.7                         | 8.05      | 2495.9         | 2112            | 4.56                 | 32.8            |
| Inshore                 | 26.7          | 326.0                         | 8.04      | 2485.9         | 2090            | 4.68                 | 32.7            |
| Offshore                | 27.5          | 302.5                         | 8.06      | 2572.8         | 2124            | 5.2                  | 34.8            |
| Offshore                | 27.5          | 298.1                         | 8.06      | 2579.3         | 2126            | 5.25                 | 34.8            |
| Offshore                | 27.5          | 287.5                         | 8.06      | 2583.8         | 2120            | 5.37                 | 34.8            |

228

229 **Table S1.** Carbonate system parameters of seawater samples obtained in December 2016 from  
 230 inshore and offshore locations in southern Belize near coral sampling sites demonstrating  
 231 similarity to experimental seawater treatments (see table 1 in the main text).

| MEASURED PARAMETERS             |               |               |               |               |               |               |               |               |  |  |
|---------------------------------|---------------|---------------|---------------|---------------|---------------|---------------|---------------|---------------|--|--|
| <b>pCO<sub>2</sub></b> (μatm-v) | 311           | 405           | 701           | 3309          | 288           | 447           | 673           | 3285          |  |  |
| <b>Sal</b>                      | 31.72         | 31.77         | 31.69         | 31.77         | 31.74         | 31.72         | 31.69         | 31.74         |  |  |
| <b>SD</b>                       | 0.21          | 0.22          | 0.22          | 0.23          | 0.25          | 0.25          | 0.24          | 0.21          |  |  |
| <b>Range</b>                    | 31.26 - 32.06 | 31.26 - 32.13 | 31.23 - 32.03 | 31.26 - 32.06 | 31.19 - 32.12 | 31.03 - 32.16 | 31.16 - 32.12 | 31.23 - 32.06 |  |  |
| <b>n</b>                        | 120           | 120           | 120           | 120           | 120           | 120           | 120           | 120           |  |  |
| <b>Temp</b> (°C)                | 27.9          | 28.0          | 28.1          | 28.1          | 31.0          | 31.1          | 30.9          | 31.0          |  |  |
| <b>SD</b>                       | 0.4           | 0.4           | 0.5           | 0.2           | 0.4           | 0.5           | 0.3           | 0.5           |  |  |
| <b>Range</b>                    | 27.2 - 29.6   | 27.0 - 29.0   | 27.1 - 30.2   | 27.7 - 28.7   | 30.0 - 32.2   | 30.4 - 32.5   | 30.1 - 31.7   | 30.0 - 33.0   |  |  |
| <b>n</b>                        | 120           | 120           | 120           | 120           | 120           | 120           | 120           | 120           |  |  |
| <b>pH<sub>M-NBS</sub></b>       | 8.30          | 8.20          | 8.01          | 7.31          | 8.34          | 8.21          | 8.00          | 7.29          |  |  |
| <b>SD</b>                       | 0.11          | 0.09          | 0.34          | 0.07          | 0.12          | 0.11          | 0.12          | 0.10          |  |  |
| <b>Range</b>                    | 8.03 - 8.46   | 7.93 - 8.33   | 7.62 - 11.62  | 7.13 - 7.45   | 7.97 - 8.55   | 7.94 - 8.51   | 7.61 - 8.20   | 7.12 - 7.53   |  |  |
| <b>n</b>                        | 120           | 120           | 120           | 120           | 120           | 120           | 120           | 120           |  |  |
| <b>TA</b> (μM)                  | 2052          | 2081          | 2092          | 2131          | 2101          | 2077          | 2082          | 2123          |  |  |
| <b>SD</b>                       | 43            | 17            | 37            | 25            | 32            | 32            | 35            | 22            |  |  |
| <b>Range</b>                    | 1947 - 2104   | 2053 - 2121   | 2012 - 2128   | 2076 - 2160   | 2048 - 2152   | 2010 - 2125   | 2021 - 2134   | 2071 - 2148   |  |  |
| <b>n</b>                        | 29            | 30            | 30            | 30            | 29            | 30            | 30            | 30            |  |  |
| <b>DIC</b> (μM)                 | 1708          | 1788          | 1901          | 2156          | 1710          | 1773          | 1865          | 2135          |  |  |
| <b>SD</b>                       | 78            | 52            | 46            | 34            | 57            | 80            | 42            | 28            |  |  |
| <b>Range</b>                    | 1551 - 1829   | 1702 - 1859   | 1830 - 1981   | 2082 - 2217   | 1611 - 1795   | 1625 - 1905   | 1757 - 1917   | 2084 - 2194   |  |  |
| <b>n</b>                        | 29            | 30            | 30            | 30            | 29            | 30            | 30            | 30            |  |  |

**Table S2.** Average measured parameters for all treatments: salinity (Sal), temperature (Temp), pH, total alkalinity (TA), and dissolved inorganic carbon (DIC). 'SD' represents standard deviation and 'n' is the sample size.

| CALCULATED PARAMETERS      |                       |             |             |             |             |             |             |             |             |  |  |  |
|----------------------------|-----------------------|-------------|-------------|-------------|-------------|-------------|-------------|-------------|-------------|--|--|--|
| $p\text{CO}_2$ (gas-e)     | ( $\mu\text{atm-v}$ ) | 311         | 405         | 701         | 3309        | 288         | 447         | 673         | 3285        |  |  |  |
| <b>SD</b>                  |                       | 96          | 91          | 94          | 414         | 65          | 152         | 104         | 484         |  |  |  |
| <b>Range</b>               |                       | 165 - 520   | 252 - 553   | 555 - 981   | 2442 - 4299 | 214 - 416   | 236 - 792   | 462 - 879   | 2681 - 4438 |  |  |  |
| <b>n</b>                   |                       | 29          | 30          | 30          | 30          | 29          | 30          | 30          | 30          |  |  |  |
| $\text{pH}_{\text{c-NBS}}$ |                       | 8.27        | 8.18        | 7.97        | 7.37        | 8.29        | 8.15        | 7.99        | 7.38        |  |  |  |
| <b>SD</b>                  |                       | 0.10        | 0.08        | 0.05        | 0.05        | 0.07        | 0.11        | 0.06        | 0.06        |  |  |  |
| <b>Range</b>               |                       | 8.07 - 8.45 | 8.06 - 8.33 | 7.85 - 8.05 | 7.25 - 7.48 | 8.16 - 8.38 | 7.93 - 8.34 | 7.89 - 8.11 | 7.25 - 7.46 |  |  |  |
| <b>n</b>                   |                       | 29          | 30          | 30          | 30          | 29          | 30          | 30          | 30          |  |  |  |
| $[\text{CO}_3^{2-}]$       | ( $\mu\text{M}$ )     | 241         | 209         | 145         | 42          | 274         | 217         | 162         | 47          |  |  |  |
| <b>SD</b>                  |                       | 39          | 28          | 12          | 5           | 31          | 40          | 18          | 6           |  |  |  |
| <b>Range</b>               |                       | 173 - 312   | 170 - 260   | 115 - 164   | 32 - 54     | 217 - 315   | 144 - 288   | 129 - 195   | 34 - 57     |  |  |  |
| <b>n</b>                   |                       | 29          | 30          | 30          | 30          | 29          | 30          | 30          | 30          |  |  |  |
| $[\text{HCO}_3^-]$         | ( $\mu\text{M}$ )     | 1459        | 1568        | 1737        | 2029        | 1429        | 1545        | 1687        | 2009        |  |  |  |
| <b>SD</b>                  |                       | 109         | 77          | 51          | 29          | 82          | 114         | 51          | 23          |  |  |  |
| <b>Range</b>               |                       | 1235 - 1643 | 1435 - 1666 | 1652 - 1841 | 1967 - 2076 | 1301 - 1553 | 1332 - 1742 | 1551 - 1748 | 1965 - 2052 |  |  |  |
| <b>n</b>                   |                       | 29          | 30          | 30          | 30          | 29          | 30          | 30          | 30          |  |  |  |
| $[\text{CO}_2]$ (sw)       | ( $\mu\text{M}$ )     | 8           | 10          | 18          | 85          | 7           | 11          | 16          | 79          |  |  |  |
| <b>SD</b>                  |                       | 2           | 2           | 2           | 11          | 2           | 4           | 2           | 12          |  |  |  |
| <b>Range</b>               |                       | 4 - 13      | 7 - 14      | 14 - 25     | 63 - 111    | 5 - 10      | 6 - 19      | 11 - 21     | 64 - 109    |  |  |  |
| <b>n</b>                   |                       | 29          | 30          | 30          | 30          | 29          | 30          | 30          | 30          |  |  |  |
| $\Omega_A$                 |                       | 4.0         | 3.4         | 2.4         | 0.7         | 4.6         | 3.6         | 2.7         | 0.8         |  |  |  |
| <b>SD</b>                  |                       | 0.6         | 0.5         | 0.2         | 0.1         | 0.5         | 0.7         | 0.3         | 0.1         |  |  |  |
| <b>Range</b>               |                       | 2.8 - 5.1   | 2.8 - 4.3   | 1.9 - 2.7   | 0.5 - 0.9   | 3.6 - 5.2   | 2.4 - 4.8   | 2.2 - 3.3   | 0.6 - 0.9   |  |  |  |
| <b>n</b>                   |                       | 29          | 30          | 30          | 30          | 29          | 30          | 30          | 30          |  |  |  |

**Table S3.** Average measured parameters for all treatments:  $p\text{CO}_2$  of the mixed gases in equilibrium with seawaters ( $p\text{CO}_2$  (gas-e)); calculated pH ( $\text{pH}_{\text{c}}$ ); carbonate ion concentration ( $[\text{CO}_3^{2-}]$ ); bicarbonate ion concentration ( $[\text{HCO}_3^-]$ ); dissolved carbon dioxide ( $[\text{CO}_2]_{\text{sw}}$ ); and aragonite saturation state ( $\Omega_A$ ). ‘SD’ represents standard deviation and ‘n’ is the sample size.



| Model                                                      | AIC      | df |
|------------------------------------------------------------|----------|----|
| Temperature * Reef                                         | 508.5704 | 6  |
| Reef                                                       | 506.5132 | 4  |
| Temperature                                                | 505.4378 | 4  |
| Species * Reef                                             | 481.4342 | 10 |
| Species                                                    | 477.2899 | 6  |
| Reef * $p\text{CO}_2$ * Temperature                        | 476.3029 | 18 |
| $p\text{CO}_2$ * Reef                                      | 475.0965 | 10 |
| $p\text{CO}_2$                                             | 473.5468 | 6  |
| Temperature * $p\text{CO}_2$                               | 471.7448 | 10 |
| Species * Temperature * Reef                               | 470.4927 | 17 |
| Species * Temperature                                      | 459.8295 | 10 |
| Species * $p\text{CO}_2$ * Reef                            | 458.286  | 34 |
| Species * $p\text{CO}_2$ * Reef + Temperature              | 457.005  | 35 |
| Species * $p\text{CO}_2$ + Temperature + Reef              | 451.5823 | 20 |
| Species * $p\text{CO}_2$                                   | 451.1012 | 18 |
| Species * $p\text{CO}_2$ + Temperature                     | 449.6505 | 19 |
| Species * $p\text{CO}_2$ * Temperature * Reef              | 449.1111 | 59 |
| $p\text{CO}_2$ * Temperature * Reef + Species              | 448.8439 | 21 |
| Species + $p\text{CO}_2$ * Temperature + Reef              | 446.5169 | 14 |
| Species * Reef + $p\text{CO}_2$ + Temperature              | 446.3451 | 14 |
| Species + $p\text{CO}_2$ + Temperature * Reef              | 445.5166 | 12 |
| $p\text{CO}_2$ * Temperature + Species                     | 444.6838 | 13 |
| Species + $p\text{CO}_2$ + Temperature + Reef              | 444.5401 | 11 |
| $p\text{CO}_2$ * Reef + Species + Temperature              | 443.6495 | 14 |
| Species + $p\text{CO}_2$ + Temperature                     | 442.6241 | 10 |
| Species * $p\text{CO}_2$ * Temperature + Reef              | 440.0991 | 33 |
| Species * $p\text{CO}_2$ * Temperature                     | 438.1393 | 32 |
| Species * Temperature * Reef + $p\text{CO}_2$              | 438.0031 | 20 |
| <b>Species * (<math>p\text{CO}_2</math> + Temperature)</b> | 432.9082 | 22 |
| Species * Temperature + Reef + $p\text{CO}_2$              | 430.5345 | 14 |
| Species * Temperature + $p\text{CO}_2$                     | 428.5378 | 13 |

234  
235  
236  
237

**Table S4.** Summary of AIC and degrees of freedom (df) for all model combinations. The model combination in bold is the final model used in this analysis.

| Species              | Treatment | N         | Mean Calcification<br>(mg cm <sup>2</sup> day <sup>-1</sup> ) | Lower 95% CI | Upper 95% CI |        |
|----------------------|-----------|-----------|---------------------------------------------------------------|--------------|--------------|--------|
| <i>S. siderea</i>    | 28°C      | 311 µatm  | 10                                                            | 1.106        | 0.872        | 1.342  |
|                      |           | 405 µatm  | 12                                                            | 1.256        | 1.038        | 1.468  |
|                      |           | 701 µatm  | 11                                                            | 1.084        | 0.875        | 1.302  |
|                      |           | 3309 µatm | 12                                                            | 0.280        | 0.070        | 0.492  |
|                      | 31°C      | 288 µatm  | 8                                                             | 1.093        | 0.854        | 1.335  |
|                      |           | 447 µatm  | 11                                                            | 1.243        | 1.026        | 1.448  |
|                      |           | 673 µatm  | 11                                                            | 1.071        | 0.856        | 1.286  |
|                      |           | 3285 µatm | 12                                                            | 0.267        | 0.047        | 0.468  |
| <i>P. strigosa</i>   | 28°C      | 311 µatm  | 15                                                            | 1.198        | 0.989        | 1.408  |
|                      |           | 405 µatm  | 5                                                             | 0.504        | 0.209        | 0.828  |
|                      |           | 701 µatm  | 14                                                            | 0.665        | 0.443        | 0.871  |
|                      |           | 3309 µatm | 16                                                            | 0.181        | -0.015       | 0.374  |
|                      | 31°C      | 288 µatm  | 9                                                             | 0.202        | -0.023       | 0.450  |
|                      |           | 447 µatm  | 6                                                             | -0.493       | -0.801       | -0.184 |
|                      |           | 673 µatm  | 7                                                             | -0.332       | -0.606       | -0.088 |
|                      |           | 3285 µatm | 8                                                             | -0.815       | -1.058       | -0.564 |
| <i>P. astreoides</i> | 28°C      | 311 µatm  | 11                                                            | 0.072        | -0.159       | 0.304  |
|                      |           | 405 µatm  | 12                                                            | 0.010        | -0.233       | 0.231  |
|                      |           | 701 µatm  | 10                                                            | -0.196       | -0.438       | 0.050  |
|                      |           | 3309 µatm | 12                                                            | -0.680       | -0.903       | -0.456 |
|                      | 31°C      | 288 µatm  | 6                                                             | 0.229        | -0.039       | 0.497  |
|                      |           | 447 µatm  | 8                                                             | 0.166        | -0.073       | 0.419  |
|                      |           | 673 µatm  | 9                                                             | -0.039       | -0.280       | 0.219  |
|                      |           | 3285 µatm | 4                                                             | -0.523       | -0.803       | -0.246 |
| <i>U. tenuifolia</i> | 28°C      | 311 µatm  | 11                                                            | 0.147        | -0.138       | 0.432  |
|                      |           | 405 µatm  | 7                                                             | 0.237        | -0.125       | 0.611  |
|                      |           | 701 µatm  | 4                                                             | 0.029        | -0.398       | 0.465  |
|                      |           | 3309 µatm | 5                                                             | -0.241       | -0.650       | 0.177  |
|                      | 31°C      | 288 µatm  | 4                                                             | 0.129        | -0.304       | 0.583  |
|                      |           | 447 µatm  | 0                                                             | NA           | NA           | NA     |
|                      |           | 673 µatm  | 1                                                             | 0.011        | -0.565       | 0.601  |
|                      |           | 3285 µatm | 0                                                             | NA           | NA           | NA     |

239

240 **Table S5.** Bootstrapped modelled mean calcification rate for each species in all  $p\text{CO}_2$  and  
241 temperature treatments reported in  $\text{mg cm}^2 \text{ day}^{-1}$ . Sample sizes (N) and 95% confidence intervals  
242 (CI) are reporter for each modelled mean calcification rate (figure 1).

243

| Fixed effect                                               | Value  | SE    | <i>t</i> -value |
|------------------------------------------------------------|--------|-------|-----------------|
| (Intercept)                                                | 1.089  | 0.163 | 6.664           |
| Species (PSTR)                                             | 0.106  | 0.224 | 0.471           |
| Species (PAST)                                             | -1.020 | 0.231 | -4.412          |
| Species (UTEN)                                             | -0.947 | 0.251 | -3.769          |
| <i>p</i> CO <sub>2</sub> - current                         | 0.163  | 0.148 | 1.102           |
| <i>p</i> CO <sub>2</sub> - end-of-century                  | -0.002 | 0.150 | -0.013          |
| <i>p</i> CO <sub>2</sub> - extreme                         | -0.809 | 0.146 | -5.522          |
| Temperature (31°C)                                         | -0.011 | 0.100 | -0.113          |
| Species (PSTR) * <i>p</i> CO <sub>2</sub> - current        | -0.887 | 0.228 | -3.886          |
| Species (PAST) * <i>p</i> CO <sub>2</sub> - current        | -0.224 | 0.215 | -1.039          |
| Species (UTEN) * <i>p</i> CO <sub>2</sub> - current        | -0.074 | 0.280 | -0.263          |
| Species (PSTR) * <i>p</i> CO <sub>2</sub> - end-of-century | -0.523 | 0.205 | -2.558          |
| Species (PAST) * <i>p</i> CO <sub>2</sub> - end-of-century | -0.267 | 0.220 | -1.216          |
| Species (UTEN) * <i>p</i> CO <sub>2</sub> - end-of-century | -0.121 | 0.295 | -0.410          |
| Species (PSTR) * <i>p</i> CO <sub>2</sub> - extreme        | -0.189 | 0.199 | -0.950          |
| Species (PAST) * <i>p</i> CO <sub>2</sub> - extreme        | 0.063  | 0.221 | 0.284           |
| Species (UTEN) * <i>p</i> CO <sub>2</sub> - extreme        | 0.420  | 0.298 | 1.409           |
| Species (PSTR) * Temperature (31°C)                        | -1.066 | 0.154 | -6.923          |
| Species (PAST) * Temperature (31°C)                        | 0.166  | 0.153 | 1.080           |
| Species (UTEN) * Temperature (31°C)                        | -0.013 | 0.273 | -0.048          |
| Colony (intercept)                                         | 0.147  |       |                 |
| Residual                                                   | 0.215  |       |                 |

244  
245  
246  
247  
248

**Table S6.** Summary output of the linear mixed effects model used to determine the relationship between calcification rates, *p*CO<sub>2</sub>, and temperature for all four coral species (PSTR = *P. strigosa*; PAST = *P. astreoides*; UTEN = *U. tenuifolia*). Temperature and *p*CO<sub>2</sub> were treated as factors.

| Species              | Treatment | N         | Mean LE<br>(mm day <sup>-1</sup> ) | Lower 95% CI | Upper 95% CI |        |
|----------------------|-----------|-----------|------------------------------------|--------------|--------------|--------|
| <i>S. sidera</i>     | 28°C      | 311 µatm  | 11                                 | 0.0080       | 0.0070       | 0.0090 |
|                      |           | 405 µatm  | 9                                  | 0.0082       | 0.0074       | 0.0091 |
|                      |           | 701 µatm  | 11                                 | 0.0086       | 0.0076       | 0.0095 |
|                      |           | 3309 µatm | 12                                 | 0.0075       | 0.0066       | 0.0083 |
|                      | 31°C      | 288 µatm  | 10                                 | 0.0069       | 0.0059       | 0.0079 |
|                      |           | 447 µatm  | 8                                  | 0.0071       | 0.0062       | 0.0081 |
|                      |           | 673 µatm  | 11                                 | 0.0075       | 0.0066       | 0.0083 |
|                      |           | 3285 µatm | 12                                 | 0.0063       | 0.0055       | 0.0072 |
| <i>P. astreoides</i> | 28°C      | 311 µatm  | 9                                  | 0.0059       | 0.0048       | 0.0069 |
|                      |           | 405 µatm  | 9                                  | 0.0047       | 0.0037       | 0.0058 |
|                      |           | 701 µatm  | 9                                  | 0.0046       | 0.0036       | 0.0056 |
|                      |           | 3309 µatm | 12                                 | 0.0033       | 0.0023       | 0.0043 |
|                      | 31°C      | 288 µatm  | 7                                  | 0.0054       | 0.0042       | 0.0066 |
|                      |           | 447 µatm  | 5                                  | 0.0042       | 0.0031       | 0.0053 |
|                      |           | 673 µatm  | 6                                  | 0.0041       | 0.0029       | 0.0051 |
|                      |           | 3285 µatm | 1                                  | 0.0028       | 0.0014       | 0.0042 |

249  
250  
251  
252  
253

**Table S7.** Bootstrapped modelled mean linear extension for each species in all  $p\text{CO}_2$  and temperature treatments reported in  $\text{mm day}^{-1}$ . Sample sizes (N) and 95% confidence intervals (CI) are reported for each mean extension rate (figure 2).

| Fixed effect                                               | Estimate  | SE       | <i>t</i> -value |
|------------------------------------------------------------|-----------|----------|-----------------|
| Intercept                                                  | 7.86E-03  | 6.31E-04 | 12.5            |
| Species (PAST)                                             | -1.95E-03 | 9.14E-04 | -2.14           |
| <i>p</i> CO <sub>2</sub> - current                         | 3.62E-04  | 6.24E-04 | 0.058           |
| <i>p</i> CO <sub>2</sub> - end-of-century                  | 7.32E-04  | 6.11E-04 | 1.20            |
| <i>p</i> CO <sub>2</sub> - extreme                         | -4.50E-04 | 6.01E-04 | -0.075          |
| Temperature (31°C)                                         | -1.08E-03 | 4.12E-04 | -2.62           |
| Species (PAST) * <i>p</i> CO <sub>2</sub> - current        | -1.51E-03 | 9.35E-04 | -1.62           |
| Species (PAST) * <i>p</i> CO <sub>2</sub> - end-of-century | -2.01E-03 | 9.38E-04 | -2.15           |
| Species (PAST) * <i>p</i> CO <sub>2</sub> - extreme        | -2.15E-03 | 9.60E-04 | -2.24           |
| Species (PAST) * Temperature (31°C)                        | 5.01E-04  | 6.94E-04 | 0.072           |
| Colony                                                     | 1.68E-06  |          |                 |
| Residual                                                   | 3.46E-06  |          |                 |

254  
255  
256  
257  
258

**Table S8.** Summary output of the linear mixed effects model used to determine the relationship between linear extension, *p*CO<sub>2</sub> and temperature for *S. siderea* and *P. astreoides* (PAST). Temperature and *p*CO<sub>2</sub> were treated as factors.

| Species              | Treatment | T0        | T30 | T60 | T90 |    |
|----------------------|-----------|-----------|-----|-----|-----|----|
| <i>S. siderea</i>    | 28°C      | 311 µatm  | 10  | 10  | 10  | 10 |
|                      |           | 405 µatm  | 12  | 12  | 12  | 12 |
|                      |           | 701 µatm  | 11  | 11  | 11  | 11 |
|                      |           | 3309 µatm | 12  | 12  | 12  | 12 |
|                      | 31°C      | 288 µatm  | 8   | 8   | 8   | 8  |
|                      |           | 447 µatm  | 11  | 11  | 11  | 11 |
|                      |           | 673 µatm  | 12  | 11  | 11  | 11 |
|                      |           | 3285 µatm | 12  | 12  | 12  | 12 |
| <i>P. strigosa</i>   | 28°C      | 311 µatm  | 16  | 16  | 15  | 15 |
|                      |           | 405 µatm  | 8   | 6   | 5   | 5  |
|                      |           | 701 µatm  | 14  | 14  | 14  | 14 |
|                      |           | 3309 µatm | 16  | 16  | 16  | 16 |
|                      | 31°C      | 288 µatm  | 14  | 11  | 9   | 9  |
|                      |           | 447 µatm  | 13  | 11  | 6   | 6  |
|                      |           | 673 µatm  | 15  | 13  | 7   | 7  |
|                      |           | 3285 µatm | 13  | 11  | 8   | 8  |
| <i>P. astreoides</i> | 28°C      | 311 µatm  | 11  | 11  | 11  | 11 |
|                      |           | 405 µatm  | 12  | 12  | 12  | 12 |
|                      |           | 701 µatm  | 12  | 11  | 10  | 10 |
|                      |           | 3309 µatm | 12  | 12  | 12  | 12 |
|                      | 31°C      | 288 µatm  | 11  | 8   | 6   | 6  |
|                      |           | 447 µatm  | 9   | 8   | 8   | 8  |
|                      |           | 673 µatm  | 12  | 12  | 9   | 9  |
|                      |           | 3285 µatm | 10  | 6   | 4   | 4  |
| <i>U. tenuifolia</i> | 28°C      | 311 µatm  | 12  | 11  | 11  | 11 |
|                      |           | 405 µatm  | 7   | 7   | 7   | 7  |
|                      |           | 701 µatm  | 8   | 5   | 4   | 4  |
|                      |           | 3309 µatm | 8   | 6   | 5   | 5  |
|                      | 31°C      | 288 µatm  | 8   | 8   | 4   | 4  |
|                      |           | 447 µatm  | 1   | 0   | 0   | 0  |
|                      |           | 673 µatm  | 4   | 2   | 1   | 1  |
|                      |           | 3285 µatm | 0   | 0   | 0   | 0  |

260

261

262

263

**Table S9.** Sample size surviving for each species at each time point per treatment that was used for constructing survival curves (figure S6).



| Species              | Fixed Effect                                   | Hazard rate | Hazard ratio | Hazard ratio SE | <i>z</i> | <i>P</i> |
|----------------------|------------------------------------------------|-------------|--------------|-----------------|----------|----------|
| <i>S. siderea</i>    | <i>p</i> CO <sub>2</sub>                       | -5.39E-06   | 1.00         | 0.00            | 0        | 1.00     |
|                      | Temperature (31°C )                            | 22.09       | 3.92E+09     | 0.00            | Inf      | 0.00     |
|                      | <i>p</i> CO <sub>2</sub> * Temperature (31°C ) | -5.87E-04   | 1.00         | 0.00            | -Inf     | 0.00     |
| <i>P. strigosa</i>   | <i>p</i> CO <sub>2</sub>                       | -3.72E-03   | 1.00         | 0.00            | -1.02    | 0.31     |
|                      | Temperature (31°C )                            | 0.58        | 1.79         | 1.51            | 0.39     | 0.70     |
|                      | <i>p</i> CO <sub>2</sub> * Temperature (31°C ) | 3.54E-03    | 1.00         | 0.00            | 0.97     | 0.33     |
| <i>P. astreoides</i> | <i>p</i> CO <sub>2</sub>                       | 3.12E-04    | 1.00         | 0.00            | 1.20     | 0.23     |
|                      | Temperature (31°C )                            | 0.47        | 1.60         | 1.17            | 0.40     | 0.69     |
|                      | <i>p</i> CO <sub>2</sub> * Temperature (31°C ) | 3.28E-03    | 1.00         | 0.00            | 1.52     | 0.13     |
| <i>U. tenuifolia</i> | <i>p</i> CO <sub>2</sub>                       | 3.41E-04    | 1.00         | 2.66E-04        | 1.28     | 0.20     |
|                      | Temperature (31°C )                            | 0.52        | 1.68         | 1.17            | 0.44     | 0.66     |
|                      | <i>p</i> CO <sub>2</sub> * Temperature (31°C ) | 3.26E-03    | 1.00         | 2.17E-03        | 1.51     | 0.13     |

265

266

267

268

269

**Table S10.** Cox mixed effects proportional hazards analysis for survival of all four species. The ‘hazard rate’ represents the modelled risk of death, so that positive values represent increased risk. The ‘hazard ratio’ indicates the hazard in the treatment compared to the control.

| Species              | Fixed Effect                           | loglik  | $\chi^2$ | DF | P            |
|----------------------|----------------------------------------|---------|----------|----|--------------|
| <i>S. siderea</i>    | NULL                                   | -4.48   |          |    |              |
|                      | pCO <sub>2</sub>                       | -4.34   | 0.27     | 1  | 0.6          |
|                      | Temperature (31°C )                    | -3.61   | 1.47     | 1  | 0.23         |
|                      | Reef environment                       | -2.94   | 1.35     | 1  | 0.225        |
|                      | pCO <sub>2</sub> * Temperature (31°C ) | -3.61   | 0        | 1  | 1            |
| <i>P. strigosa</i>   | NULL                                   | -131.95 |          |    |              |
|                      | pCO <sub>2</sub>                       | -121.63 | 20.64    | 1  | 5.53E-06 *** |
|                      | Temperature (31°C )                    | -113.32 | 16.61    | 1  | 4.60E-05 *** |
|                      | Reef environment                       | -113.29 | 0.07     | 1  | 0.79         |
|                      | pCO <sub>2</sub> * Temperature (31°C ) | -111.80 | 3.06     | 1  | 0.08         |
| <i>P. astreoides</i> | NULL                                   | -74.67  |          |    |              |
|                      | pCO <sub>2</sub>                       | -73.25  | 2.84     | 1  | 0.09         |
|                      | Temperature (31°C )                    | -66.06  | 14.38    | 1  | 1.49E-04 *** |
|                      | Reef environment                       | -64.55  | 3.02     | 1  | 0.08         |
|                      | pCO <sub>2</sub> * Temperature (31°C ) | -65.41  | 1.3      | 1  | 0.25         |
| <i>U. tenuifolia</i> | NULL                                   | -59.12  |          |    |              |
|                      | pCO <sub>2</sub>                       | -58.36  | 1.5      | 1  | 0.22         |
|                      | Temperature (31°C )                    | -54.28  | 8.18     | 1  | 4.24E-03 **  |
|                      | Reef environment                       | -54.16  | 0.24     | 1  | 0.63         |
|                      | pCO <sub>2</sub> * Temperature (31°C ) | -53.49  | 1.56     | 1  | 0.21         |

270  
271  
272  
273

**Table S11.** Statistical outcomes for coral survival analyses of all four species, using Cox mixed effects proportional hazards models.

| Species            | Reef Environment | Treatment | N         | Mean Calcification<br>(mg cm <sup>2</sup> day <sup>-1</sup> ) | Lower<br>95% CI | Upper<br>95% CI |        |
|--------------------|------------------|-----------|-----------|---------------------------------------------------------------|-----------------|-----------------|--------|
| <i>S. siderea</i>  | Offshore         | 28°C      | 311 µatm  | 6                                                             | 1.045           | 0.803           | 1.284  |
|                    |                  |           | 405 µatm  | 6                                                             | 1.192           | 0.974           | 1.411  |
|                    |                  |           | 701 µatm  | 6                                                             | 1.023           | 0.808           | 1.252  |
|                    |                  |           | 3309 µatm | 6                                                             | 0.217           | -0.002          | 0.441  |
|                    |                  | 31°C      | 288 µatm  | 4                                                             | 1.031           | 0.789           | 1.275  |
|                    |                  |           | 447 µatm  | 5                                                             | 1.177           | 0.956           | 1.398  |
|                    |                  |           | 673 µatm  | 6                                                             | 1.008           | 0.789           | 1.228  |
|                    |                  |           | 3285 µatm | 6                                                             | 0.202           | -0.022          | 0.405  |
|                    | Inshore          | 28°C      | 311 µatm  | 4                                                             | 1.173           | 0.926           | 1.421  |
|                    |                  |           | 405 µatm  | 6                                                             | 1.320           | 1.094           | 1.539  |
|                    |                  |           | 701 µatm  | 5                                                             | 1.151           | 0.926           | 1.374  |
|                    |                  |           | 3309 µatm | 6                                                             | 0.345           | 0.129           | 0.564  |
|                    |                  | 31°C      | 288 µatm  | 4                                                             | 1.159           | 0.905           | 1.407  |
|                    |                  |           | 447 µatm  | 6                                                             | 1.305           | 1.073           | 1.522  |
| <i>P. strigosa</i> | Offshore         | 28°C      | 311 µatm  | 10                                                            | 1.141           | 0.935           | 1.354  |
|                    |                  |           | 405 µatm  | 3                                                             | 0.444           | 0.146           | 0.778  |
|                    |                  |           | 701 µatm  | 8                                                             | 0.605           | 0.387           | 0.822  |
|                    |                  |           | 3309 µatm | 10                                                            | 0.124           | -0.078          | 0.322  |
|                    |                  | 31°C      | 288 µatm  | 5                                                             | 0.144           | -0.088          | 0.386  |
|                    |                  |           | 447 µatm  | 3                                                             | -0.553          | -0.859          | -0.233 |
|                    |                  |           | 673 µatm  | 4                                                             | -0.392          | -0.672          | -0.141 |
|                    |                  |           | 3285 µatm | 5                                                             | -0.874          | -1.136          | -0.621 |
|                    | Inshore          | 28°C      | 311 µatm  | 5                                                             | 1.269           | 1.042           | 1.488  |
|                    |                  |           | 405 µatm  | 2                                                             | 0.572           | 0.265           | 0.904  |
|                    |                  |           | 701 µatm  | 6                                                             | 0.733           | 0.495           | 0.952  |
|                    |                  |           | 3309 µatm | 6                                                             | 0.252           | 0.044           | 0.466  |
|                    |                  | 31°C      | 288 µatm  | 4                                                             | 0.272           | 0.036           | 0.527  |
|                    |                  |           | 447 µatm  | 3                                                             | -0.425          | -0.744          | -0.107 |
|                    |                  | 673 µatm  | 3         | -0.264                                                        | -0.544          | -0.006          |        |
|                    |                  | 3285 µatm | 3         | -0.746                                                        | -0.997          | -0.482          |        |

| Species              | Reef Environment | Treatment | N     | Mean Calcification<br>(mg cm <sup>2</sup> day <sup>-1</sup> ) | Lower<br>95% CI | Upper<br>95% CI |
|----------------------|------------------|-----------|-------|---------------------------------------------------------------|-----------------|-----------------|
| <i>P. astreoides</i> | Offshore         | 311 µatm  | 6     | 0.012                                                         | -0.226          | 0.255           |
|                      |                  | 405 µatm  | 6     | -0.053                                                        | -0.296          | 0.171           |
|                      |                  | 701 µatm  | 5     | -0.259                                                        | -0.496          | -0.010          |
|                      |                  | 3309 µatm | 6     | -0.749                                                        | -0.991          | -0.508          |
|                      |                  | 288 µatm  | 3     | 0.163                                                         | -0.119          | 0.435           |
|                      |                  | 447 µatm  | 4     | 0.098                                                         | -0.146          | 0.353           |
|                      |                  | 673 µatm  | 4     | -0.108                                                        | -0.356          | 0.155           |
|                      |                  | 3285 µatm | 0     | NA                                                            | NA              | NA              |
|                      | Inshore          | 311 µatm  | 4     | 0.140                                                         | -0.102          | 0.385           |
|                      |                  | 405 µatm  | 6     | 0.075                                                         | -0.180          | 0.301           |
|                      |                  | 701 µatm  | 5     | -0.131                                                        | -0.379          | 0.121           |
|                      |                  | 3309 µatm | 6     | -0.621                                                        | -0.853          | -0.399          |
|                      |                  | 288 µatm  | 4     | 0.291                                                         | 0.015           | 0.574           |
|                      |                  | 447 µatm  | 6     | 0.226                                                         | -0.020          | 0.485           |
| <i>U. tenuifolia</i> | Offshore         | 311 µatm  | 3     | 0.060                                                         | -0.233          | 0.361           |
|                      |                  | 405 µatm  | 2     | 0.152                                                         | -0.233          | 0.539           |
|                      |                  | 701 µatm  | 1     | -0.062                                                        | -0.513          | 0.380           |
|                      |                  | 3309 µatm | 1     | -0.337                                                        | -0.773          | 0.099           |
|                      |                  | 288 µatm  | 0     | NA                                                            | NA              | NA              |
|                      |                  | 447 µatm  | 0     | NA                                                            | NA              | NA              |
|                      |                  | 673 µatm  | 0     | NA                                                            | NA              | NA              |
|                      |                  | 3285 µatm | 0     | NA                                                            | NA              | NA              |
|                      | Inshore          | 311 µatm  | 8     | 0.188                                                         | -0.099          | 0.479           |
|                      |                  | 405 µatm  | 5     | 0.280                                                         | -0.071          | 0.650           |
|                      |                  | 701 µatm  | 3     | 0.066                                                         | -0.369          | 0.515           |
|                      |                  | 3309 µatm | 4     | -0.209                                                        | -0.621          | 0.210           |
|                      |                  | 288 µatm  | 4     | 0.150                                                         | -0.284          | 0.597           |
|                      |                  | 447 µatm  | 0     | NA                                                            | NA              | NA              |
| 31°C                 | 673 µatm         | 1         | 0.028 | -0.536                                                        | 0.622           |                 |
|                      | 3285 µatm        | 0         | NA    | NA                                                            | NA              |                 |

276

277 **Table S12.** Bootstrapped modelled mean calcification rate for each species by reef environment  
278 in all  $p\text{CO}_2$  and temperature treatments reported in  $\text{mg cm}^{-2} \text{day}^{-1}$ . Sample sizes (N) and 95%  
279 confidence intervals (CI) are reported for each mean calcification rate (figure S11).

280

| Species              | Reef Environment | Treatment | N         | Mean LE (mm day <sup>-1</sup> ) | Lower 95% CI | Upper 95% CI |        |
|----------------------|------------------|-----------|-----------|---------------------------------|--------------|--------------|--------|
| <i>S. siderea</i>    | Offshore         | 28°C      | 311 µatm  | 6                               | 0.0076       | 0.0066       | 0.0087 |
|                      |                  |           | 405 µatm  | 6                               | 0.0078       | 0.0069       | 0.0088 |
|                      |                  |           | 701 µatm  | 6                               | 0.0082       | 0.0072       | 0.0091 |
|                      |                  |           | 3309 µatm | 6                               | 0.0071       | 0.0062       | 0.0080 |
|                      |                  | 31°C      | 288 µatm  | 4                               | 0.0065       | 0.0054       | 0.0076 |
|                      |                  |           | 447 µatm  | 4                               | 0.0067       | 0.0057       | 0.0077 |
|                      |                  |           | 673 µatm  | 6                               | 0.0071       | 0.0061       | 0.0080 |
|                      |                  |           | 3285 µatm | 6                               | 0.0059       | 0.0050       | 0.0069 |
|                      | Inshore          | 28°C      | 311 µatm  | 3                               | 0.0084       | 0.0073       | 0.0096 |
|                      |                  |           | 405 µatm  | 5                               | 0.0086       | 0.0077       | 0.0096 |
|                      |                  |           | 701 µatm  | 5                               | 0.0090       | 0.0080       | 0.0100 |
|                      |                  |           | 3309 µatm | 6                               | 0.0079       | 0.0069       | 0.0088 |
|                      |                  | 31°C      | 288 µatm  | 4                               | 0.0073       | 0.0063       | 0.0084 |
|                      |                  |           | 447 µatm  | 6                               | 0.0075       | 0.0065       | 0.0085 |
| <i>P. astreoides</i> | Offshore         | 28°C      | 311 µatm  | 5                               | 0.0055       | 0.0043       | 0.0066 |
|                      |                  |           | 405 µatm  | 3                               | 0.0043       | 0.0031       | 0.0055 |
|                      |                  |           | 701 µatm  | 5                               | 0.0042       | 0.0031       | 0.0053 |
|                      |                  |           | 3309 µatm | 6                               | 0.0029       | 0.0018       | 0.0040 |
|                      |                  | 31°C      | 288 µatm  | 2                               | 0.0049       | 0.0037       | 0.0062 |
|                      |                  |           | 447 µatm  | 3                               | 0.0038       | 0.0026       | 0.0050 |
|                      |                  |           | 673 µatm  | 3                               | 0.0037       | 0.0025       | 0.0048 |
|                      |                  |           | 3285 µatm | 0                               | NA           | NA           | NA     |
|                      | Inshore          | 28°C      | 311 µatm  | 4                               | 0.0063       | 0.0052       | 0.0074 |
|                      |                  |           | 405 µatm  | 6                               | 0.0051       | 0.0040       | 0.0062 |
|                      |                  |           | 701 µatm  | 4                               | 0.0050       | 0.0039       | 0.0061 |
|                      |                  |           | 3309 µatm | 6                               | 0.0037       | 0.0027       | 0.0048 |
|                      |                  | 31°C      | 288 µatm  | 3                               | 0.0057       | 0.0046       | 0.0070 |
|                      |                  |           | 447 µatm  | 4                               | 0.0045       | 0.0034       | 0.0057 |
|                      |                  | 673 µatm  | 3         | 0.0045                          | 0.0033       | 0.0056       |        |
|                      |                  | 3285 µatm | 1         | 0.0032                          | 0.0017       | 0.0046       |        |

281  
282  
283  
284  
285

**Table S13.** Bootstrapped modelled mean linear extension for each species by reef environment in all  $p\text{CO}_2$  and temperature treatments reported in  $\text{mm day}^{-1}$ . Sample sizes (N) and 95% confidence intervals (CI) are reporter for each mean extension rate (figure S12).

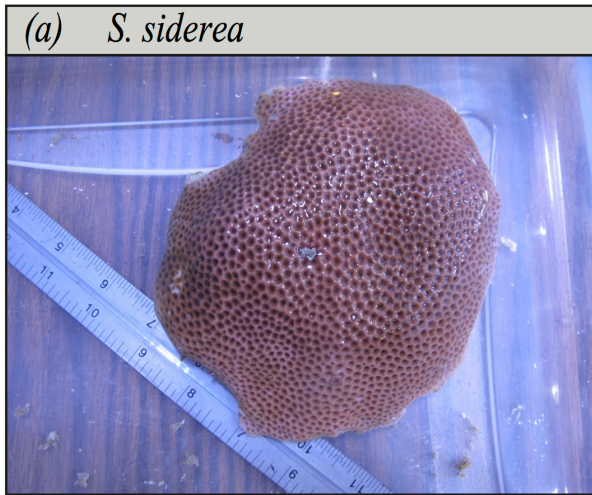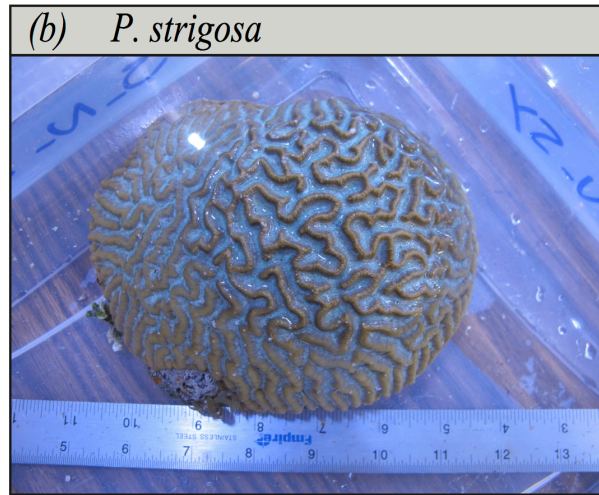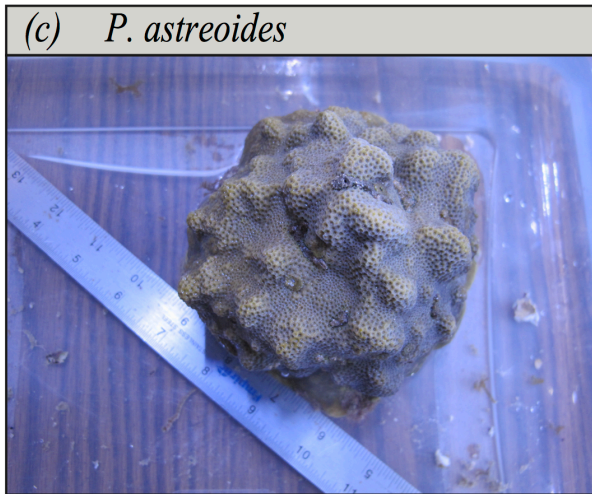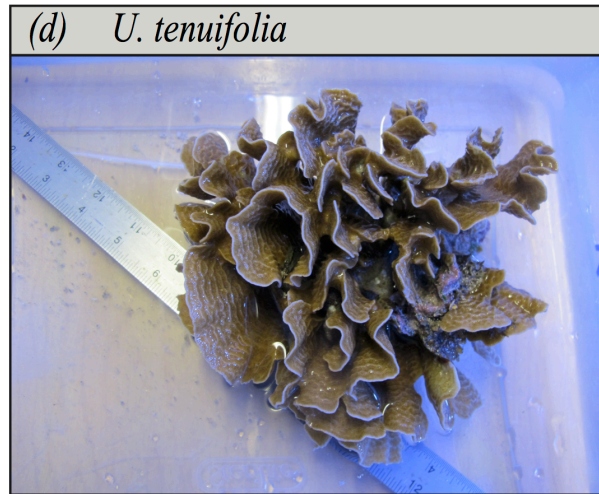

286  
287  
288  
289

**Figure S1.** Representative specimens of the collected colonies of (a) *S. siderea*, (b) *P. strigosa*, (c) *P. astreoides*, and (d) *U. tenuifolia* from the Belize Barrier Reef System prior to sectioning.



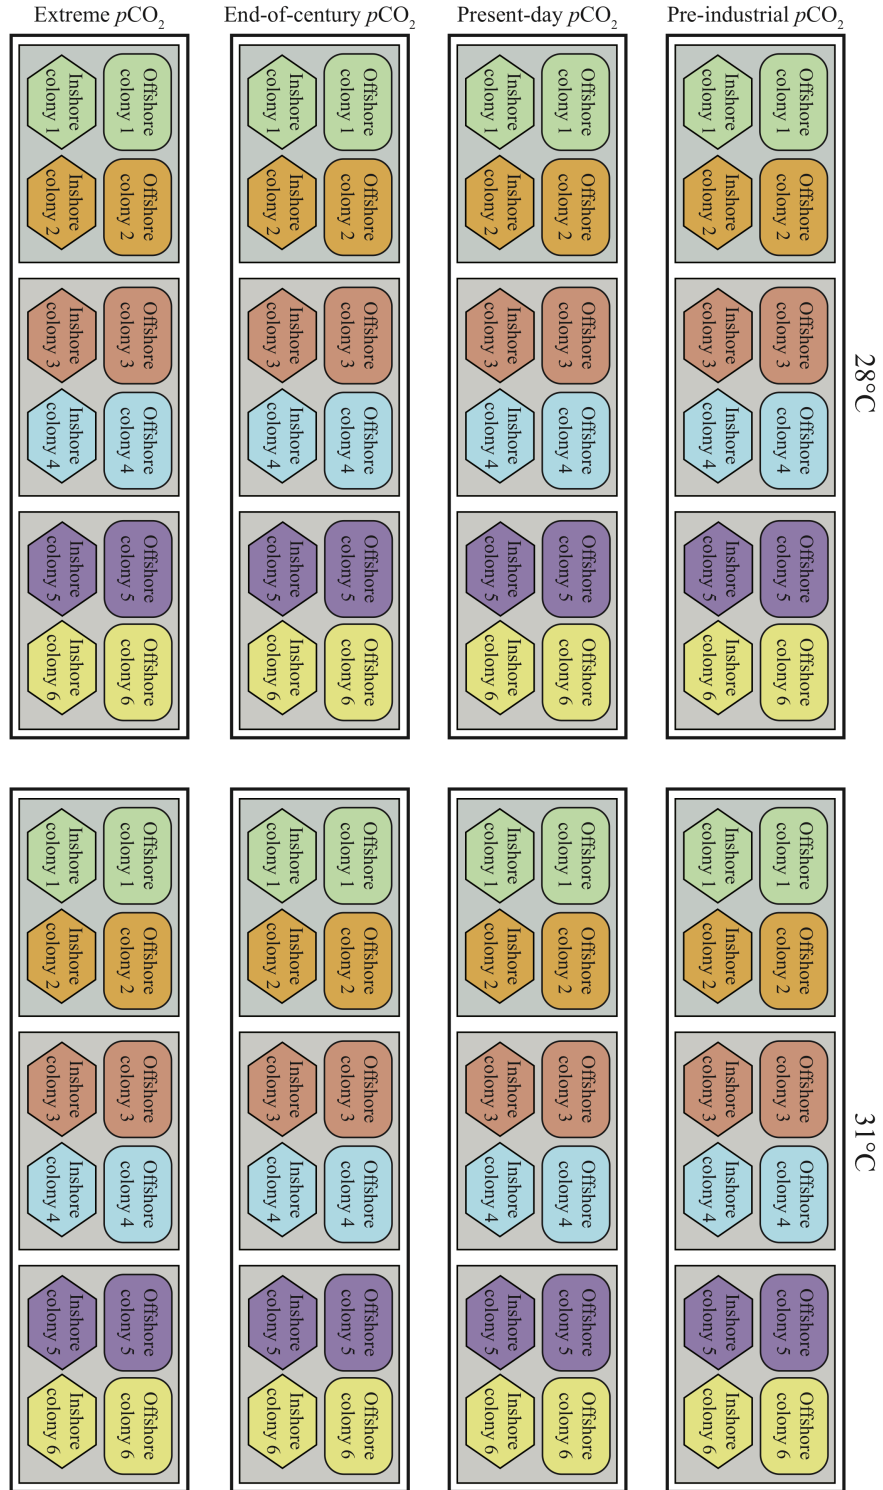

290 **Figure S2.** Diagram showing allocation of coral fragments for a single species throughout  
 291 experimental tank array. Colour represent a different colony and shape represents reef  
 292 environment. Four colonies (two from each reef environment) are reared within each tank (grey  
 293 box), with three tanks comprising a treatment (white box). This is repeated for each  $p\text{CO}_2$   
 294 treatment at both temperatures. This same experimental design was used for all four species.

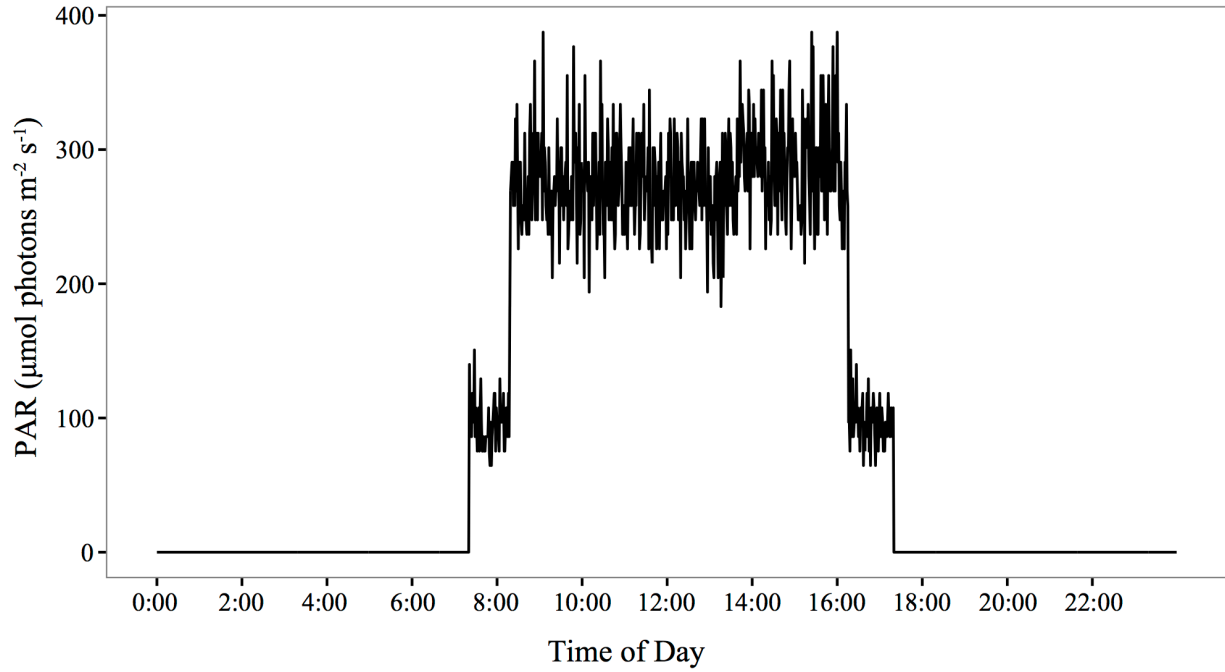

295  
296  
297  
298

**Figure S3.** Ten hour light cycle for all 24 experimental treatment tanks reported in PAR (photosynthetically active radiation;  $\mu\text{mol photons m}^{-2} \text{s}^{-1}$ ).

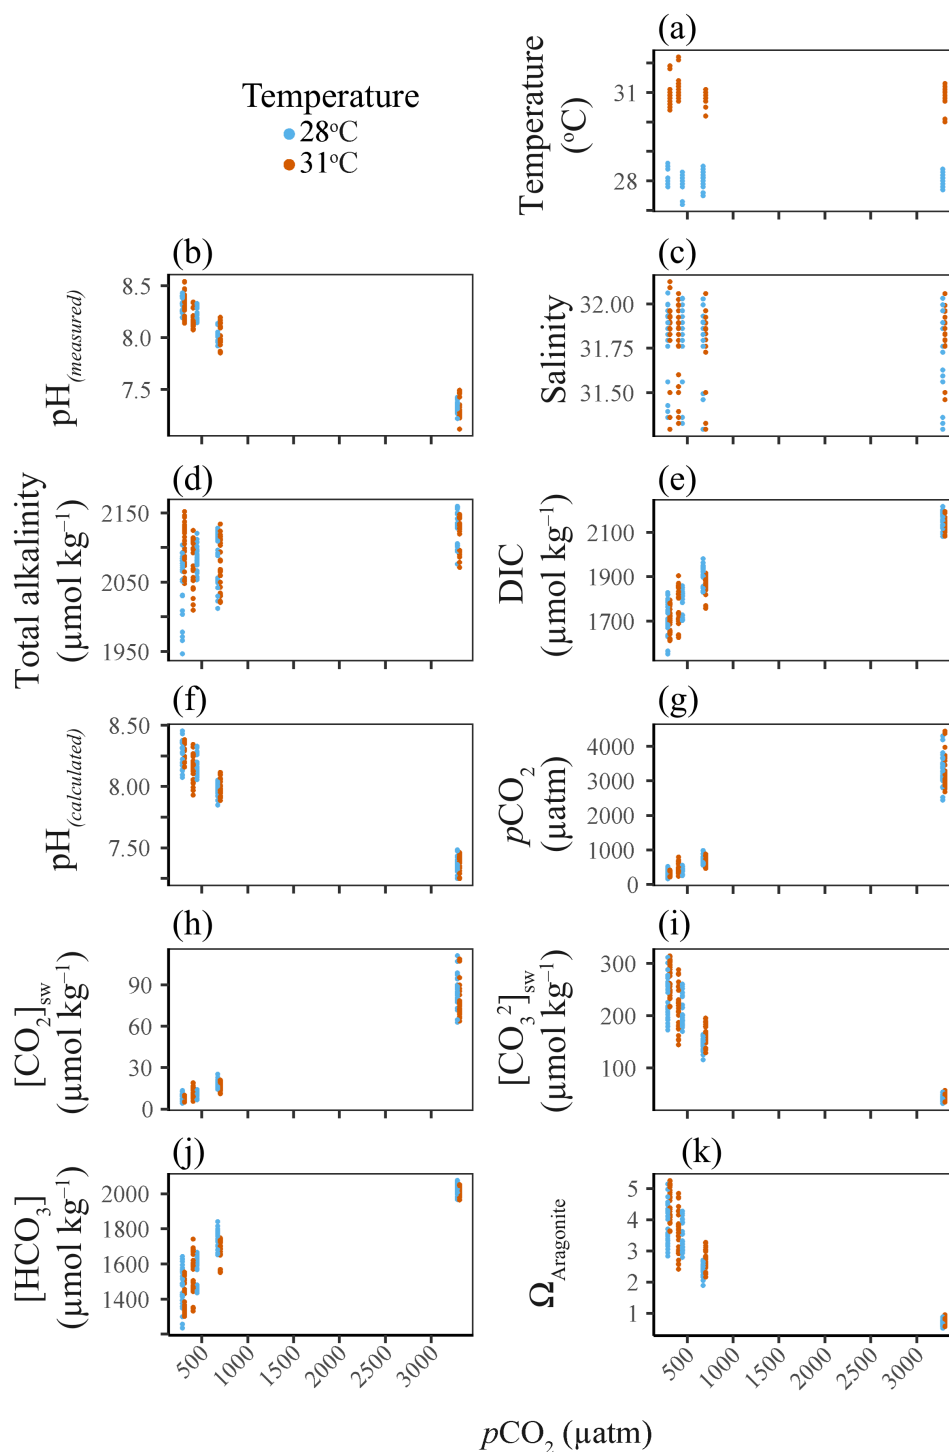

299  
 300 **Figure S4.** Calculated and measured parameters for all 24 experimental tanks over the 93-day  
 301 experimental interval: (a) measured temperature; (b) measured pH; (c) measured salinity; (d)  
 302 measured total alkalinity; (e) measured dissolved inorganic carbon; (f) calculated pH; (g)  
 303 calculated  $p\text{CO}_2$  of the mixed gases in equilibrium with the experimental seawaters; (h)  
 304 calculated dissolved carbon dioxide; (i) calculated carbonate ion concentration; (j) calculated  
 305 bicarbonate ion concentration; and (k) calculated aragonite saturation state.

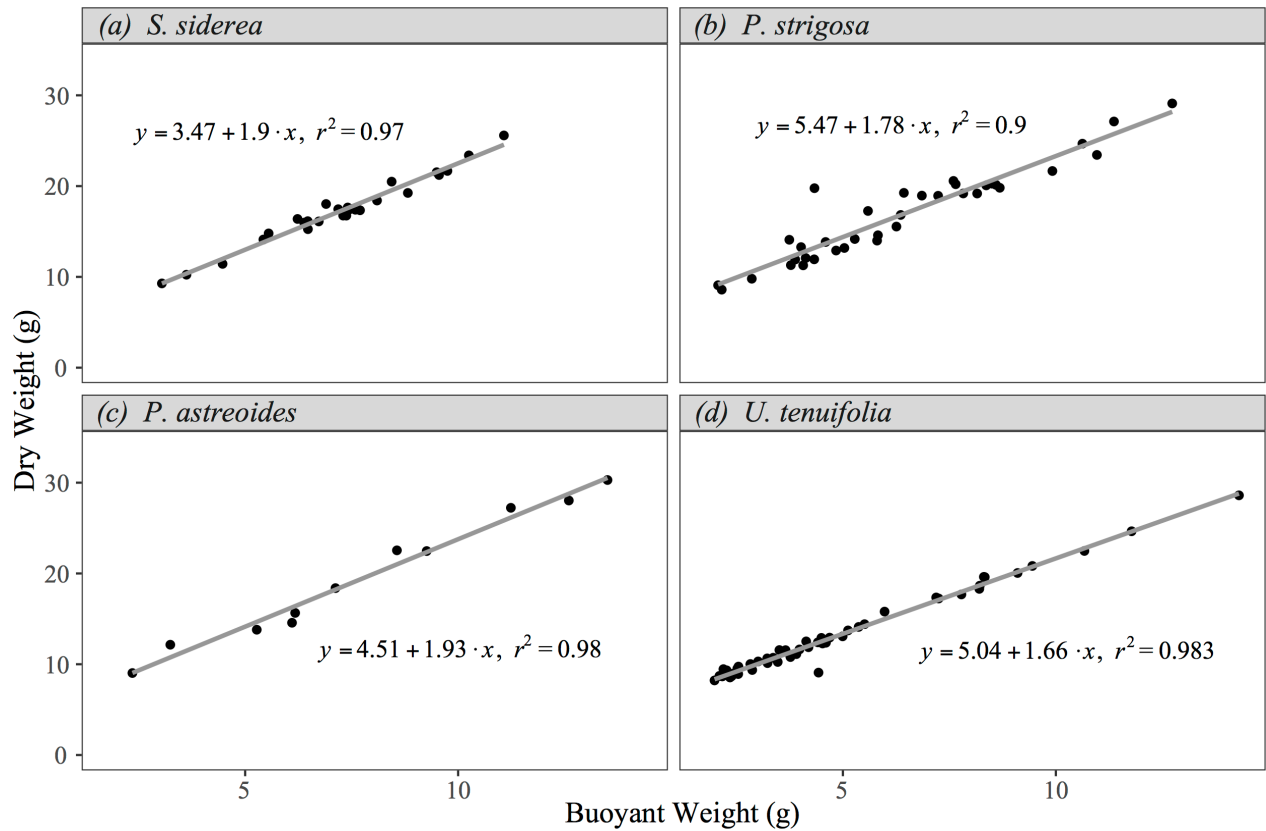

307  
 308  
 309  
 310

**Figure S5.** Linear relationship between buoyant weight (mg) and dry weight (mg) for (a) *S. siderea*, (b) *P. strigosa*, (c) *P. astreoides*, and (d) *U. tenuifolia*.

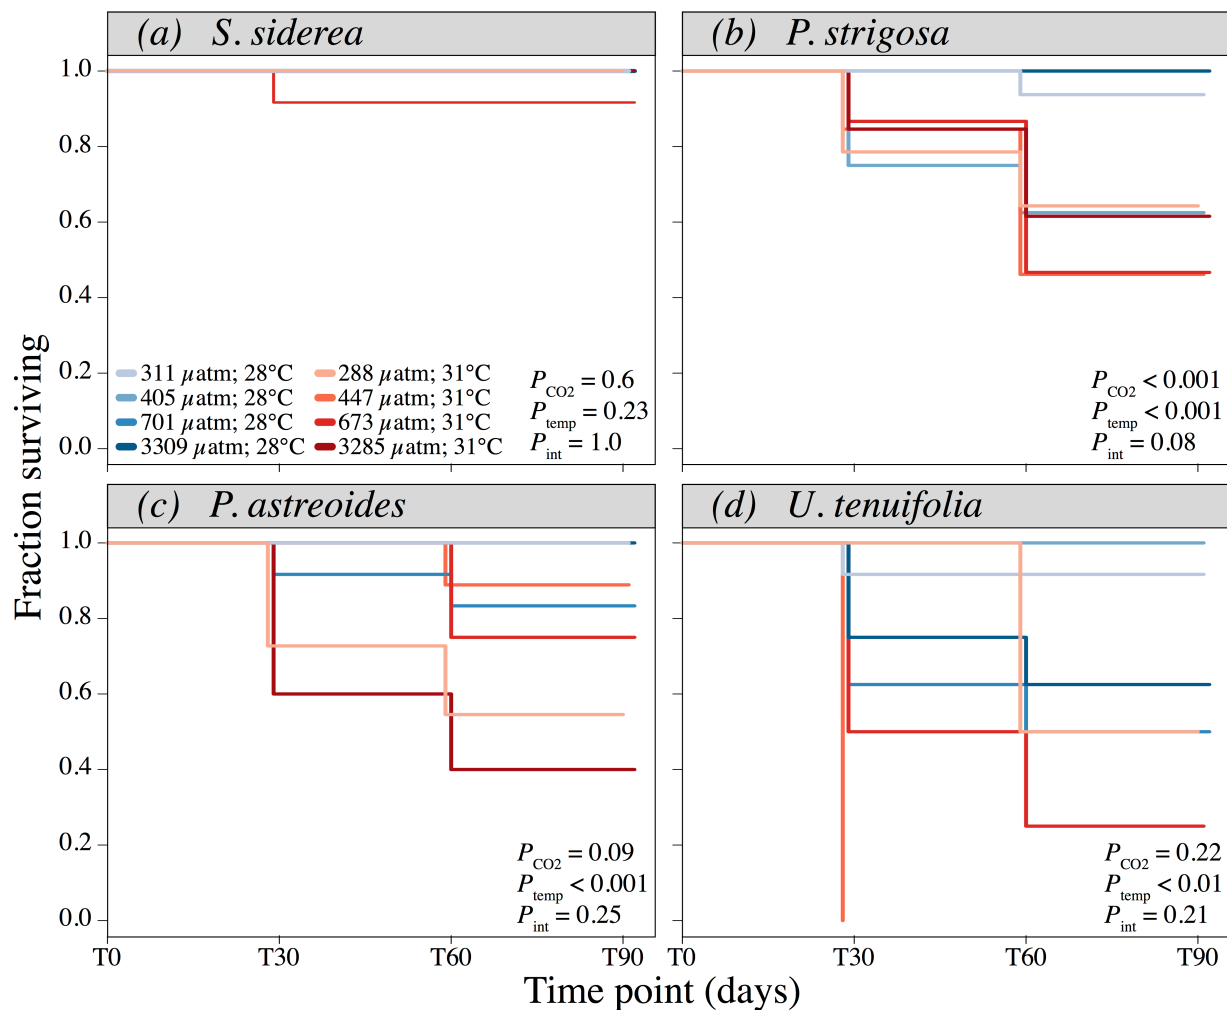

311  
 312 **Figure S6.** Fraction of fragments surviving from the start of the experiment for *S. siderea* (a), *P.*  
 313 *strigosa* (b), *P. astreoides* (c), and *U. tenuifolia* (d). Blue represents 28°C treatments and red  
 314 represents 31°C treatments. Colour intensity corresponds to  $p\text{CO}_2$  level, with the lowest intensity  
 315 representing pre-industrial  $p\text{CO}_2$  and the highest intensity representing an extreme  $p\text{CO}_2$   
 316 condition.  
 317

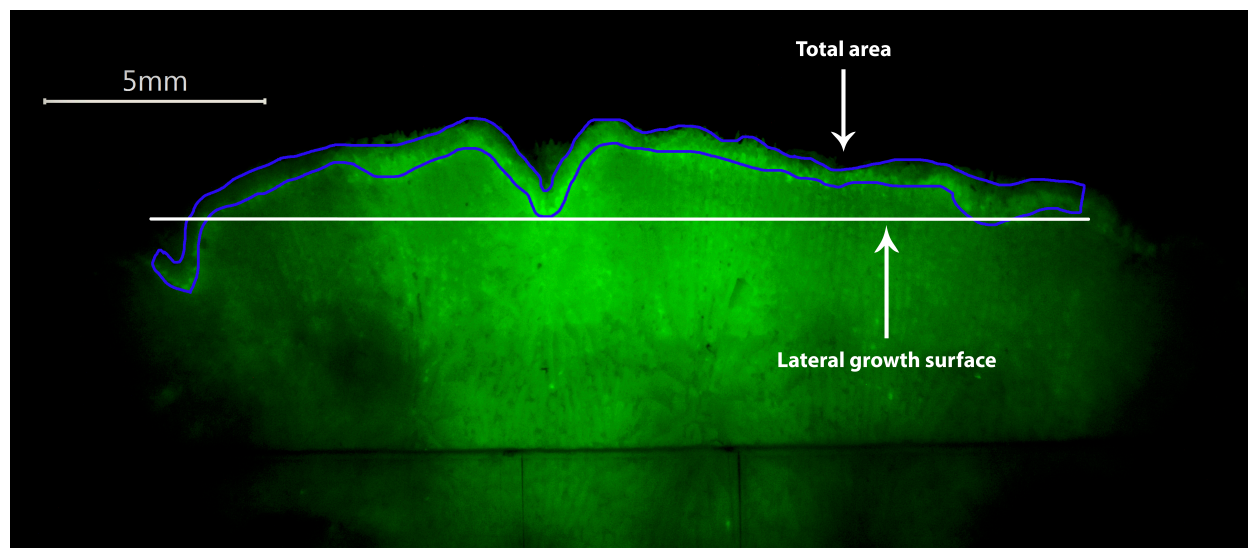

318  
319  
320  
321  
322  
323

**Figure S7.** Example of linear extension measurement for *S. siderea* sample, indicating total growth area and lateral growth surface determination using image analysis software (IMAGE J). Linear extension was calculated by dividing total growth area by lateral growth surface



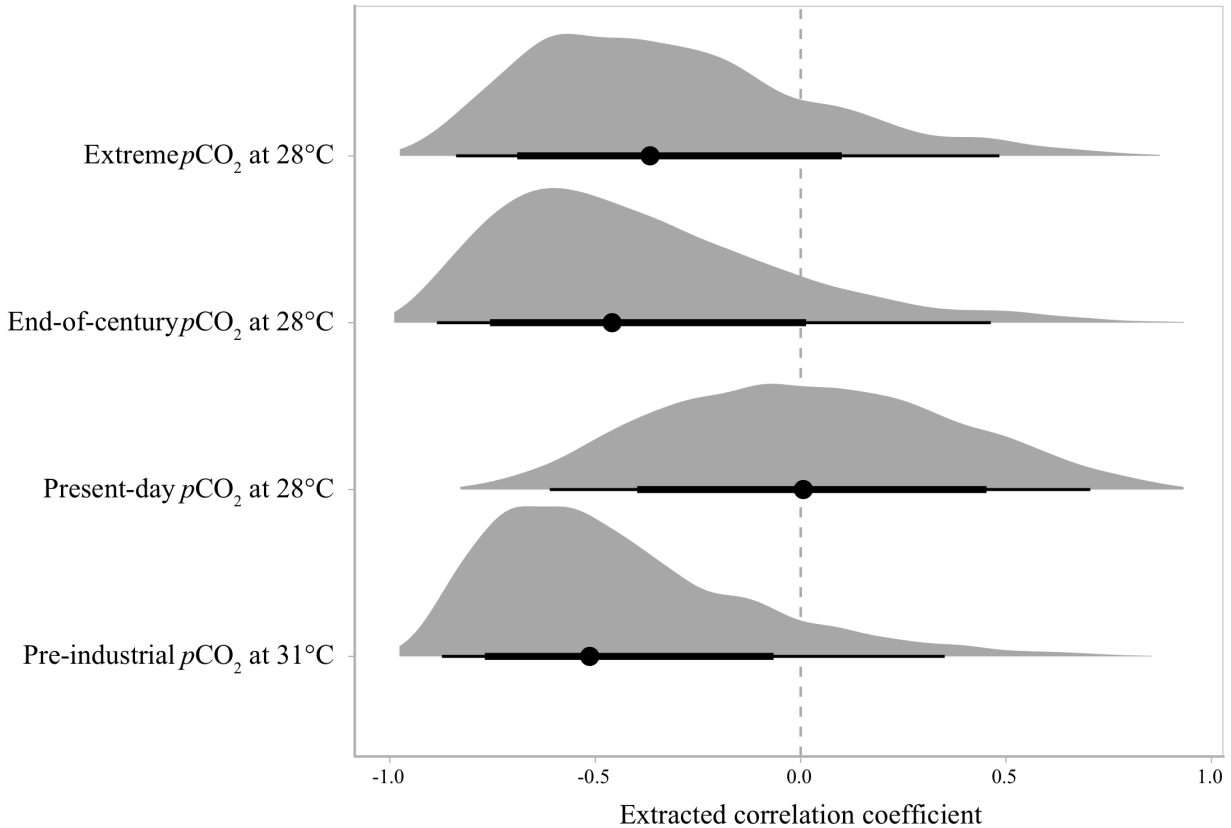

324  
 325 **Figure S8.** Density plot of the extracted correlation coefficients describing the correlation  
 326 between the Bayesian random effects of colony on calcification rate under the control treatment  
 327 (pre-industrial  $p\text{CO}_2$  at  $28^\circ\text{C}$ ) versus each stress treatment. The black circle represents the  
 328 estimated mean, the thick black bar is the 75% credible interval, the thin black bar is the 95%  
 329 credible interval, and the grey area represents the range of the Bayesian model output of the  
 330 extracted correlation coefficients. Intervals that do not overlap zero denote significant effects of  
 331 colony basal calcification rate on colony-level calcification response to  $p\text{CO}_2$  or thermal stress.  
 332

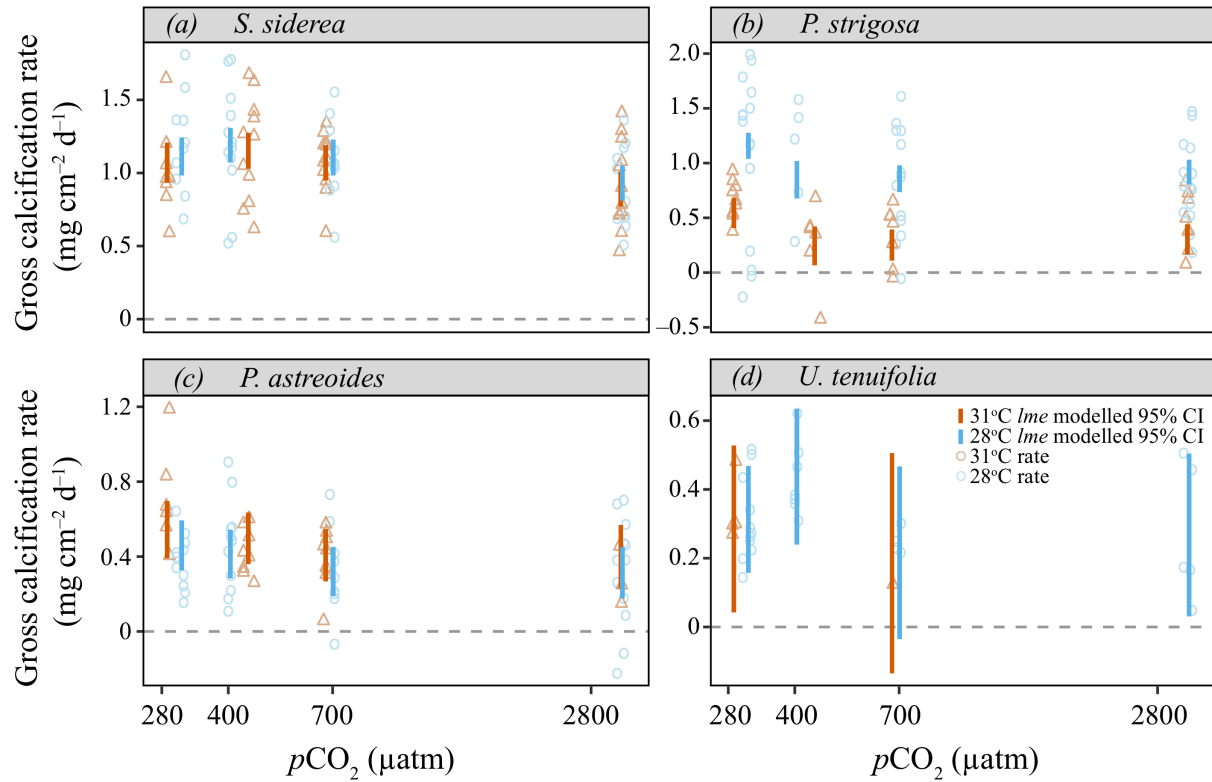

333  
 334 **Figure S9.** Modelled 95% confidence intervals of gross calcification rate for the 90-day  
 335 experimental period in  $\text{mg cm}^{-2} \text{day}^{-1}$  for (a) *S. siderea*, (b) *P. strigosa*, (c) *P. astreoides*, and (d)  
 336 *U. tenuifolia*. Blue bars represent 28°C treatment 95% confidence intervals and orange bars  
 337 represent 31°C treatment 95% confidence intervals, with  $p\text{CO}_2$  along the x-axis ( $\mu\text{atm}$ ). Blue  
 338 open circles represent gross calcification rates for individual fragments in the 28°C treatment,  
 339 and orange open circles represent gross calcification rates for individual fragments in the 31°C  
 340 treatment.  
 341

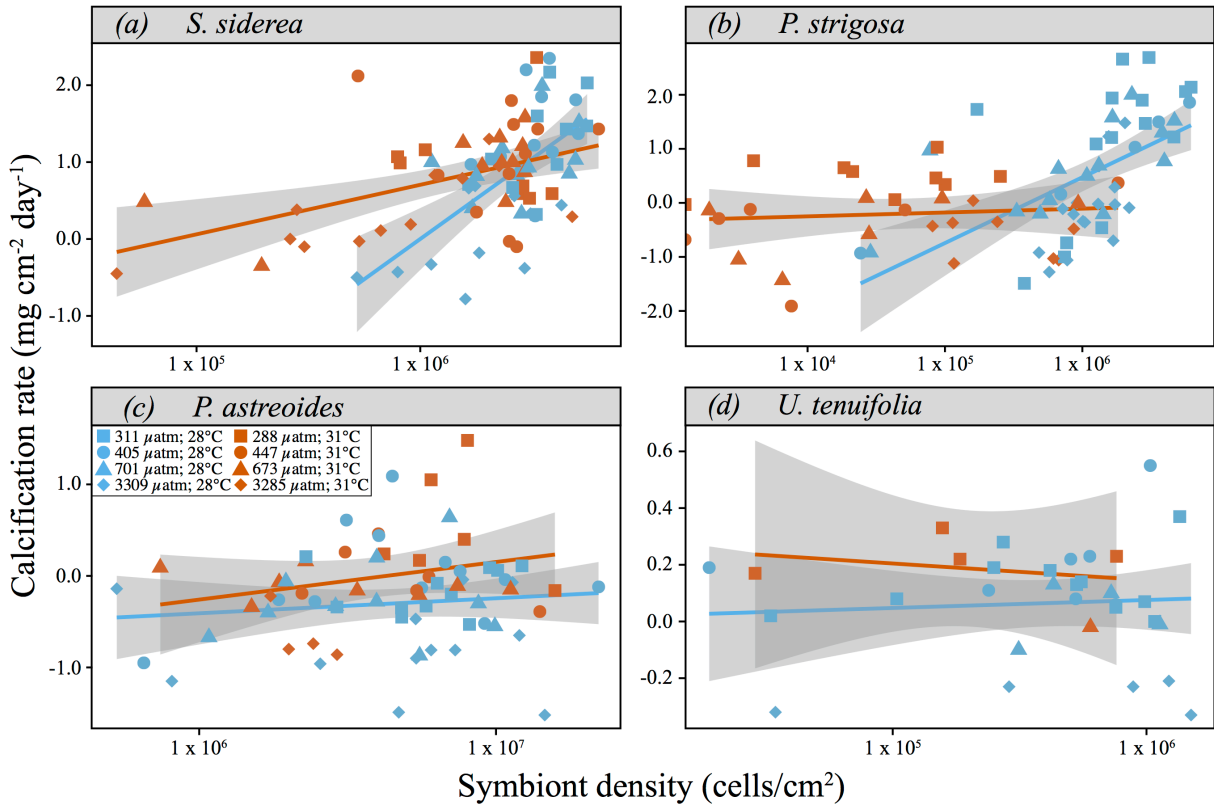

342  
343  
344  
345  
346  
347

**Figure S10.** Relationship between calcification rate and symbiont density (cell counts cm<sup>-2</sup>) for (a) *S. siderea*, (b) *P. strigosa*, (c) *P. astreoides*, and (d) *U. tenuifolia*. Shape represents pCO<sub>2</sub> treatments and colour represents temperature treatments. The line denotes a simple linear regression with standard error denoted by grey shading.

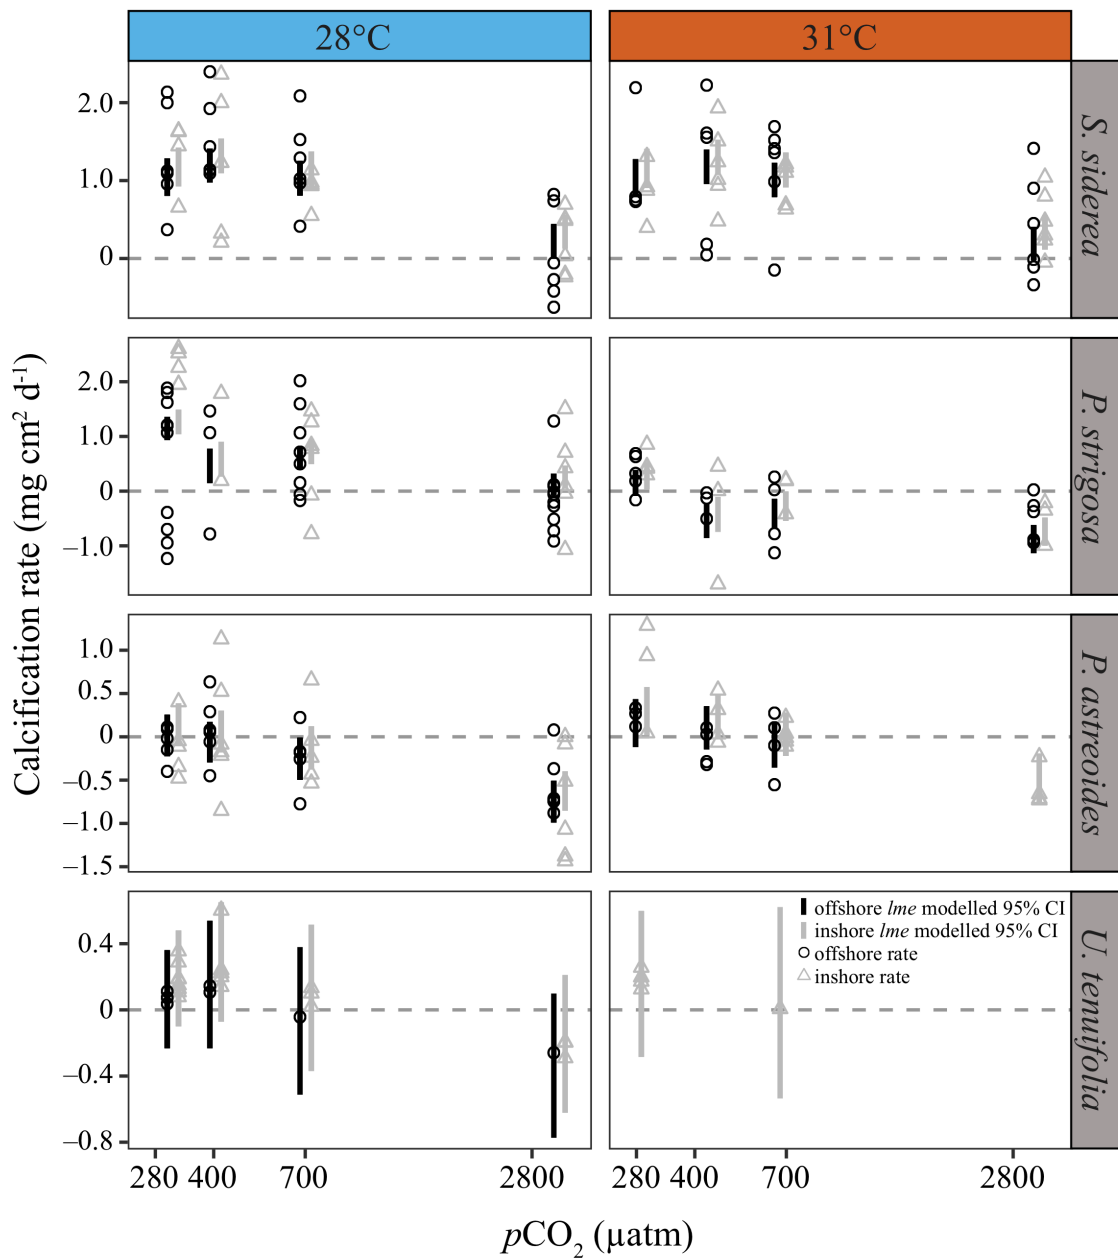

348  
 349 **Figure S11.** Modelled mean calcification rate for the 93-day experimental period in mg cm<sup>-2</sup>  
 350 day<sup>-1</sup> separated by reef environment for (a) *S. siderea*, (b) *P. strigosa*, (c) *P. astreoides*, and (d) *U.*  
 351 *tenuifolia*. Grey triangles denote inshore corals and black circles denote offshore corals. Left  
 352 panel demonstrates mean calcification rate at 28°C and the right panel shows calcification at  
 353 31°C, with pCO<sub>2</sub> along the x-axis (µatm) on a log scale. Error bars denote 95% confidence  
 354 intervals of each estimated mean.  
 355

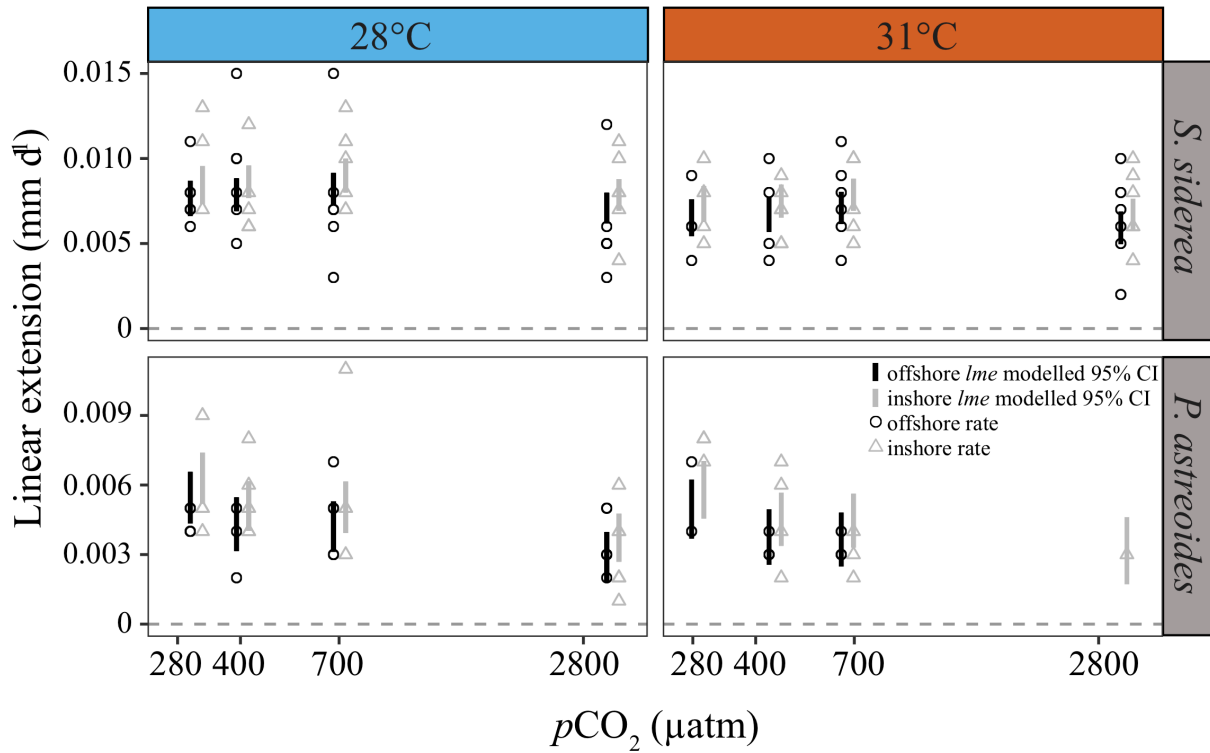

356  
 357 **Figure S12.** Modelled mean linear extension rate for the 93-day experimental period in mm cm<sup>-2</sup>  
 358 day<sup>-1</sup> separated by reef environment for (a) *S. sideraea* and (b) *P. astreoides*. Grey triangles denote  
 359 inshore corals and black circles denote offshore corals. Left panel demonstrates mean  
 360 calcification rate at 28°C and the right panel shows calcification at 31°C, with pCO<sub>2</sub> along the x-  
 361 axis (μatm) on a log scale. Error bars denote 95% confidence intervals of each estimated mean.  
 362

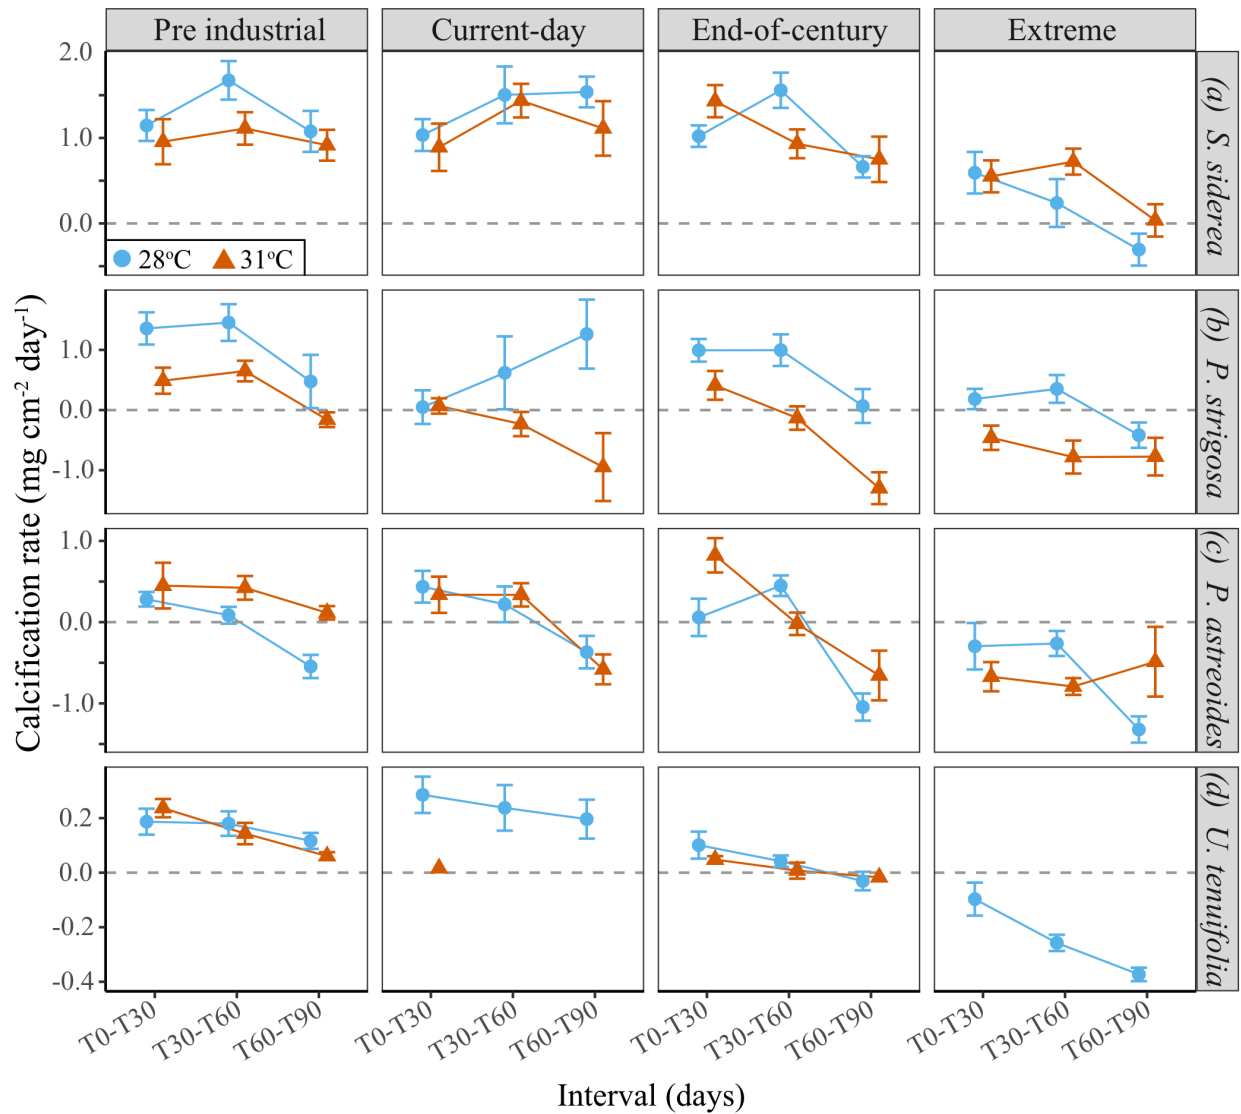

363  
 364 **Figure S13.** Mean calcification rate (mg cm<sup>-2</sup> day<sup>-1</sup>) at each 30-day experimental interval at all  
 365 pCO<sub>2</sub> treatments for (a) *S. siderea*, (b) *P. strigosa*, (c) *P. astreoides*, and (d) *U. tenuifolia*. Blue  
 366 circles represent 28°C treatments and orange triangles represent 31°C treatments, with time  
 367 interval along the x-axis. Error bars denote standard error of each mean.

368 **References:**

- 369
- 370 1. Hyde K.J.W., O'Reilly J.E., Oviatt C.A. 2007 Validation of SeaWiFS chlorophyll a in  
371 Massachusetts Bay. *Continental Shelf Research* **27**(12), 1677-1691.  
372 (doi:10.1016/j.csr.2007.02.002).
- 373 2. Soto I., Andrefouet S., Hu C., Muller-Karger F.E., Wall C.C., Sheng J., Hatcher B.G.  
374 2009 Physical connectivity in the Mesoamerican Barrier Reef System inferred from 9 years of  
375 ocean color observations. *Coral Reefs* **28**(2), 415-425. (doi:10.1007/s00338-009-0465-0).
- 376 3. Castillo K.D., Lima F.P. 2010 Comparison of in situ and satellite-derived (MODIS-  
377 Aqua/Terra) methods for assessing temperatures on coral reefs. *Limnology and Oceanography-  
378 Methods* **8**, 107-117.
- 379 4. Castillo K.D., Ries J.B., Weiss J.M., Lima F.P. 2012 Decline of forereef corals in  
380 response to recent warming linked to history of thermal exposure. *Nature Climate Change* **2**(10),  
381 756-760. (doi:10.1038/nclimate1577).
- 382 5. Baumann J.H., Townsend J.E., Courtney T.A., Aichelman H.E., Davies S.W., Lima F.P.,  
383 Castillo K.D. 2016 Temperature Regimes Impact Coral Assemblages along Environmental  
384 Gradients on Lagoonal Reefs in Belize. *Plos One* **11**(9). (doi:10.1371/journal.pone.0162098).
- 385 6. Stocker T.F., Qin D., Plattner G.-K., Tignor M., Allen S.K., Böschung J., Natels A., Via  
386 Y., Bex V., Midgley P.M. 2013 Climate Change 2013: The Physical Science Basis. Contribution  
387 of Working Group I to the Fifth Assessment Report of the Intergovernmental Panel on Climate  
388 Change. (ed. IPCC), p. 1535, 5 ed. Cambridge, United Kingdom and New York, New York,  
389 USA, Cambridge University Press.
- 390 7. Castillo K.D., Ries J.B., Bruno J.F., Westfield I.T. 2014 The reef-building coral  
391 *Siderastrea siderea* exhibits parabolic responses to ocean acidification and warming. *Proc Biol  
392 Sci* **281**(1797). (doi:10.1098/rspb.2014.1856).
- 393 8. Horvath K.M., Castillo K.D., Armstrong P., Westfield I.T., Courtney T., Ries J.B. 2016  
394 Next-century ocean acidification and warming both reduce calcification rate, but only  
395 acidification alters skeletal morphology of reef-building coral *Siderastrea siderea*. *Sci Rep* **6**,  
396 29613. (doi:10.1038/srep29613).
- 397 9. Pierrot D., Lewis E., Wallace D. 2006 MS Excel Program Developed for  
398 CO2 System Calculations. (ORNL/CDIAC-105a, Carbon Dioxide Information Analysis Center,  
399 Oak Ridge National Laboratory. U.S Department of Energy, Oak Ridge, Tennessee.
- 400 10. Roy R.N., Roy L.N., Vogel K.M., Portermoore C., Pearson T., Good C.E., Millero F.J.,  
401 Campbell D.M. 1993 The dissociation-constants of carbonic-acid in seawater at salinities 5 to 45  
402 and temperatures 0-degrees-C to 45-degrees-C. *Marine Chemistry* **44**(2-4), 249-267.  
403 (doi:10.1016/0304-4203(93)90207-5).
- 404 11. Mucci A. 1983 The solubility of calcite and aragonite in seawater at various salinities,  
405 temperatures, and one atmosphere total pressure. *American Journal of Science* **283**(7), 780-799.
- 406 12. Lewis J.B., Price W.S. 1975 Feeding mechanisms and feeding strategies of Atlantic reef  
407 corals. *Journal of Zoology* **176**(AUG), 527-544. (doi:10.1111/j.1469-7998.1975.tb03219.x).
- 408 13. Winston J.E. 1983 THE ATLANTIC BARRIER-REEF ECOSYSTEM AT CARRIE  
409 BOW CAY, BELIZE .1. STRUCTURE AND COMMUNITIES - RUTZLER,K,  
410 MACINTYRE,IG. *Ecology* **64**(3), 612-612. (doi:10.2307/1939984).
- 411 14. Venti A., Andersson A., Langdon C. 2014 Multiple driving factors explain spatial and  
412 temporal variability in coral calcification rates on the Bermuda platform. *Coral Reefs* **33**(4), 979-  
413 997. (doi:10.1007/s00338-014-1191-9).

- 414 15. Ries J.B., Ghazaleh M.N., Connolly B., Westfield I., Castillo K.D. 2016 Impacts of  
415 seawater saturation state ( $\Omega(A)=0.4-4.6$ ) and temperature (10, 25 degrees C) on the  
416 dissolution kinetics of whole-shell biogenic carbonates. *Geochimica Et Cosmochimica Acta* **192**,  
417 318-337. (doi:10.1016/j.gca.2016.07.001).
- 418 16. Therneau T.M. 2015 A Package for Survival Analysis in S.
- 419 17. Therneau T.M. 2015 coxme: Mixed Effects Cox Models.
- 420 18. R Core Development Team. 2016 R: A language and environment for statistical  
421 computing. (3.3.2 ed. Vienna, Austria, R Foundation for Statistical Computing.
- 422 19. Castillo K.D., Ries J.B., Weiss J.M. 2011 Declining Coral Skeletal Extension for  
423 Forereef Colonies of *Siderastrea siderea* on the Mesoamerican Barrier Reef System, Southern  
424 Belize. *Plos One* **6**(2). (doi:10.1371/journal.pone.0014615).
- 425
